# ZEBRAFISH GPR161 CONTRIBUTES TO BASAL HEDGEHOG REPRESSION IN A TISSUE-SPECIFIC MANNER

Philipp Tschaikner<sup>1,2</sup>, Dominik Regele<sup>1</sup>, Willi Salvenmoser<sup>3</sup>, Stephan Geley<sup>4</sup>, Eduard Stefan<sup>2</sup>, Pia  
Aanstad<sup>1</sup>

<sup>1</sup>Institute of Molecular Biology and Center for Molecular Biosciences, University of Innsbruck,  
Innsbruck, Austria

<sup>2</sup>Institute of Biochemistry and Center for Molecular Biosciences, University of Innsbruck, Innsbruck,  
Austria

<sup>3</sup>Institute of Zoology and Center of Molecular Bioscience Innsbruck, University of Innsbruck,  
Innsbruck, Austria

<sup>4</sup>Division of Molecular Pathophysiology, Medical University of Innsbruck, Innsbruck, Austria

\*Corresponding author: [Pia.Aanstad@uibk.ac.at](mailto:Pia.Aanstad@uibk.ac.at)

## Abstract

Hedgehog (Hh) ligands act as morphogens to direct patterning and proliferation during embryonic development. Protein kinase A (PKA) is a central negative regulator of Hh signalling, and in the absence of Hh ligands, PKA activity prevents inappropriate expression of Hh target genes. The G<sub>αs</sub>-coupled receptor Gpr161 contributes to the basal Hh repression machinery by activating PKA, although the extent of this contribution is unclear. Here we show that loss of Gpr161 in zebrafish leads to constitutive activation of low-, but not high-level Hh target gene expression in the neural tube. In contrast, in the myotome, both high- and low-level Hh signalling is constitutively activated in the absence of Gpr161 function. Our results suggest that the relative contribution of Gpr161 to basal repression of Hh signalling is tissue-specific. Distinct combinations of G-protein-coupled receptors may allow the fine-tuning of PKA activity to ensure the appropriate sensitivity to Hh across different tissues.

## 26 Introduction

27 The Hh signalling pathway is a key regulator of cell fate specification and proliferation during  
28 embryonic development, and plays important roles in adult tissue homeostasis (Briscoe and Théron,  
29 2013; Ingham et al., 2011). Dysregulation of Hh signalling can lead to the formation of common and  
30 severe forms of human cancers such as basal cell carcinoma and medulloblastoma (Jiang and Hui,  
31 2008; Raleigh and Reiter, 2019).

32 When Hh ligands bind their receptor Patched (Ptch), the inhibition of Smo by Ptch is alleviated, and  
33 Smo localises to the primary cilium (Corbit et al., 2005), where it activates downstream signalling to  
34 regulate the activity of the bifunctional Gli transcription factors.

35 Hh ligands act as morphogens, and the transcriptional outcome of Hh signalling is determined by the  
36 balance between repressor and activator forms of the Gli transcription factors. This balance is  
37 controlled by the activity of PKA and other kinases (Hui and Angers, 2011; Niewiadomski et al., 2019).  
38 In the absence of Hh, the basal Hh repression machinery is thought to maintain a high level of PKA  
39 activity. PKA phosphorylates the Gli proteins and primes them for further phosphorylation and  
40 proteolytic cleavage, to yield truncated forms that act as transcriptional repressors (GliR)  
41 (Niewiadomski et al., 2014; Pan et al., 2009; Wang et al., 2000). In addition, PKA also plays a role in  
42 restricting the activity of full length Gli (GliA) by promoting its association with Sufu (Humke et al.,  
43 2010; Marks and Kalderon, 2011). Low levels of exposure to Hh ligands blocks the formation of GliR,  
44 whereas high levels of Hh exposure is required for the formation of the activator forms of Gli. This is  
45 thought to be controlled through a cluster of six PKA target residues in Gli, with distinct  
46 phosphorylation patterns regulating the formation of repressor and activator forms (Niewiadomski et  
47 al., 2014). This rheostat mechanism ensures that the level of Gli transcriptional activity corresponds  
48 to the level of PKA activity, which in turn must be controlled by the level of Smo activity and Hh  
49 ligand exposure (Niewiadomski et al., 2019, 2014). Consistent with this, a complete loss of PKA  
50 activity leads to constitutive (Smo-independent) maximal Hh signalling, whereas constitutive  
51 activation of PKA abolishes all Hh-dependent transcription (Hammerschmidt et al., 1996; Tuson et al.,  
52 2011; Zhao et al., 2016).

53 A central and long-standing question in Hh signalling regards the nature and regulation of the basal  
54 repression machinery and the mechanism of regulation. In *Drosophila*, Smo has been shown to  
55 regulate PKA activity directly by activating  $G_{\alpha i}$ -proteins to modulate cAMP levels (Ogden et al., 2008).  
56 Although vertebrate Smo can also couple to  $G_{\alpha i}$  (Riobo et al., 2006), it is clear that  $G_{\alpha i}$  is not required  
57 for all aspects of vertebrate Hh signalling (Ayers and Théron, 2010), raising the question which  
58 other mechanisms contribute to the regulation of PKA.

59 The murine orphan G-protein coupled receptor (GPCR) Gpr161 contributes to basal Hh repression by  
60 activating  $G_{\alpha s}$  and consequently PKA (Mukhopadhyay et al., 2013). In the absence of Hh ligands,  
61 Gpr161 localises to the primary cilia, and is removed from the cilia upon activation of Smo  
62 (Mukhopadhyay et al., 2013; Pal et al., 2016). These results suggest that Gpr161 maintains PKA  
63 activity in the cilium in the absence of Hh, and that the ciliary exit of Gpr161 is required for Hh  
64 signalling and the reduction of PKA activity (Mukhopadhyay et al., 2013; Pal et al., 2016). However,  
65 Gpr161 has also been shown to be a substrate of PKA, and can act as an A kinase anchoring protein  
66 (Bachmann et al., 2016; Torres-Quesada et al., 2017). Thus, the exact molecular mechanisms that  
67 regulate Gpr161 activity in the context of Hh signalling remain unclear.

68 Gpr161 mutants display severe developmental malformations, including craniofacial defects and  
69 ventralisation of the neural tube, that were independent of Smo function, suggesting that Gpr161  
70 causes constitutive activation of downstream Hh signal transduction (Mukhopadhyay et al., 2013).  
71 However, the neural tube of Gpr161 mutants was less severely ventralised than that observed in  
72 embryos completely lacking PKA activity (Tuson et al., 2011). In neural progenitor cells (NPCs),  
73 Gpr161 was found to be epistatic to Smo only for low level signalling, while expression of high level  
74 targets such as Nkx2.2 and FoxA2 still depended on Smo function (Pusapati et al., 2018), suggesting  
75 that in the neural tube, Gpr161 plays an important role in controlling basal and low level Hh  
76 signalling activity. In murine NIH 3T3 fibroblasts, loss of Gpr161 does not affect basal repression,  
77 although the mutant cells displayed an increased sensitivity to Hh ligands. Taken together, these  
78 results suggest that additional  $G_{\alpha s}$ -coupled receptors may be involved in maintaining PKA activity in  
79 the absence of Hh ligands (Pusapati et al., 2018). Supporting this, several studies have identified  
80 additional GPCRs that regulate Hh signalling in parallel or downstream of Smo (Klein et al., 2001;  
81 Singh et al., 2015; Stückemann et al., 2012).

82 To facilitate the study of Gpr161 in Hh signalling during development, we have generated zebrafish  
83 *gpr161* mutants, and show that Gpr161 is an important negative modulator of Hh signalling in  
84 zebrafish embryos. We find that in the zebrafish neural tube, Gpr161 is epistatic to Smo for low-level  
85 Hh targets, however the activation of high-level targets depends on Smo activity in *gpr161* mutants.  
86 Interestingly, in the myotome, both high and low levels of Hh signalling are independent of Smo  
87 function, suggesting that several GPCRs may be involved in regulating PKA activity during Hh  
88 signalling, and that the level of contribution of Gpr161 to basal repression of Hh signalling is tissue-  
89 specific.

## 90 Results

91 Gpr161 is an evolutionary conserved GPCR with two paralogs in zebrafish

92 The zebrafish genome contains two conserved paralogs of Gpr161, Gpr161a and Gpr161b, with 71%  
93 sequence identity and 84% sequence similarity between each other, and more than 70% similarity to  
94 the murine Gpr161 protein (Figure 1A, Figure 1 Supplement 1). Expression analysis using qRT-PCR  
95 showed that both transcripts are expressed during embryonic development, but while *gpr161b* is  
96 maternally provided, *gpr161a* expression is first detected at 9 hours post fertilisation (hpf) (Figure  
97 1B). In mouse, Gpr161 localises to primary cilia, and this localisation has been proposed to be  
98 important for its role in modulating the Hh signalling pathway (Mukhopadhyay et al., 2013; Pal et al.,  
99 2016; Shimada et al., 2018). To test whether zebrafish Gpr161 also localise to primary cilia, we  
100 injected mRNA of Myc-tagged versions of Gpr161a and Gpr161b into one-cell stage zebrafish  
101 embryos. Both Gpr161a and Gpr161b were readily detected at primary cilia in gastrula stage  
102 zebrafish embryos (Figure 1C).

103 Gpr161a and Gpr161b are functionally redundant but essential during zebrafish  
104 embryonic development

105 To investigate the functional roles of Gpr161a and Gpr161b during zebrafish development, we used  
106 CRISPR/cas9 to generate mutant alleles for each gene, *gpr161a<sup>m1200</sup>*, which carries a 6bp insertion in  
107 the second coding exon of *gpr161a*, and *gpr161b<sup>m1201</sup>*, harboring an 8bp deletion in the second coding  
108 exon of *gpr161b*. Both alleles introduce premature stop codons within the 7-transmembrane-domain  
109 region of the respective proteins, and are predicted to be functionally inactive (Figure 1 Supplement  
110 2). Animals homozygous for either *gpr161a<sup>m1200</sup>* or *gpr161b<sup>m1201</sup>* alone, or animals lacking three of the  
111 four *gpr161* alleles, showed no effect either on embryonic development or in adult viability and  
112 fertility. In contrast, *gpr161a; gpr161b* double zygotic homozygous mutant embryos showed clear  
113 morphological phenotypes by 24 hpf, suggesting that Gpr161a and Gpr161b act in a functionally  
114 redundant manner (Figure 2A). To determine the contribution of maternal Gpr161b, we generated  
115 embryos from incrosses of *gpr161b<sup>-/-</sup>; gpr161a<sup>+/-</sup>* animals. Quantitative analysis of *gpr161a*  
116 expression at the 2 cell stage of these *MZgpr161b; gpr161a* mutant embryos showed that a complete  
117 loss of Gpr161b did not result in a compensatory maternal upregulation of Gpr161a (Figure 2  
118 Supplement 1). We conclude that *MZgpr161b<sup>-/-</sup>; gpr161a<sup>-/-</sup>* mutant embryos are likely to represent a  
119 complete loss of function of zebrafish Gpr161, and refer to these mutants as *gpr161* mutants below.

120 At 24hpf, *gpr161* mutant embryos display several developmental abnormalities, including malformed  
121 eyes lacking any obvious lens or retinal structure (Figure 2A). At this stage of development, wildtype  
122 embryos display chevron shaped somites, while the somites of *gpr161* mutants have a more obtuse  
123 angle (Figure 2A). These phenotypes, which are only present in the double mutant line, but not in

124 *MZgpr161b<sup>-/-</sup>; gpr161a<sup>+/-</sup> or gpr161b<sup>+/-</sup>; gpr161a<sup>-/-</sup>* embryos, are similar to those observed in *ptch1<sup>-/-</sup>;*  
125 *ptch2<sup>-/-</sup>* double mutant embryos (Koudijs et al., 2008). In contrast to *ptch1<sup>-/-</sup>; ptch2<sup>-/-</sup>* double mutant  
126 embryos which lack eyes (Koudijs et al., 2008), a rudimentary eye can be identified in *gpr161*  
127 mutants at 72 hpf (Figure 2B).

128 At this stage, the retina of wild type embryos is organised into six evolutionarily conserved layers: the  
129 pigmented epithelium, the photoreceptor cell layer, the outer plexiform layer, the inner nuclear  
130 layer, the inner plexiform layer, and the ganglion cell layer (Schmitt and Dowling, 1999). Semi-thin  
131 sectioning revealed that while eye morphogenesis was abnormal, remnants of all six layers were  
132 clearly identified by morphology (Figure 2D, Figure 2 Supplement 2A). However, these layers are not  
133 well separated and the optic cup is partially folded (Figure 2 Supplement 2B). Additionally, remnants  
134 of a forming lens can be found in *gpr161* mutant embryos (Figure 2 Supplement 2A). A striking  
135 phenotype of the *gpr161* mutants is the complete loss of jaw structures (Figure 2B), as demonstrated  
136 by scanning electron microscopy (SEM) imaging, which revealed that *gpr161* mutant embryos display  
137 an open pharynx with a complete lack of all jaw structures (Figure 2C). While *ptch1<sup>-/-</sup>; ptch2<sup>-/-</sup>* double  
138 mutant embryos were reported to lack all olfactory structures (Koudijs et al., 2008), SEM imaging  
139 revealed that in the *gpr161* mutants the olfactory pits are present, though severely reduced in size  
140 (Figure 2C).

141 Zebrafish embryos with a strong Hh gain-of-function phenotype, such as the *ptch1<sup>-/-</sup>; ptch2<sup>-/-</sup>* double  
142 mutants, also display defects in the development of the otic vesicles (Koudijs et al., 2008). The  
143 *gpr161* mutant embryos exhibited smaller otic vesicles compared to wild type embryos (Figure 2B).  
144 Serial sections of the otic vesicles revealed the absence of the dorsolateral septum (Figure 2  
145 Supplement 2C). The combination of developmental defects in ocular and otic structures is  
146 commonly seen in mutants of negative regulators of Hh signalling, such as *sufu*, *ptch1* and *hhp1*  
147 (Whitfield et al., 1996), and suggests that Gpr161 acts to negatively regulate Hh signalling also in  
148 zebrafish.

149 Gpr161 mutant mice do not form limb buds (Hwang et al., 2018; Mukhopadhyay et al., 2013) and  
150 *ptch1<sup>-/-</sup>; ptch2<sup>-/-</sup>* double mutant zebrafish embryos lack pectoral fin buds (Koudijs et al., 2008). In  
151 contrast to the requirement for Gpr161 in murine limb formation, pectoral fin formation appeared  
152 normal in the zebrafish *gpr161* mutant embryos. (Figure 2B, Figure 2 Supplement 2D).

153 Hedgehog signalling is upregulated in *gpr161* mutant embryos

154 The morphological phenotypes observed in *gpr161* mutants are consistent with increased Hh  
155 signalling. To determine whether Hh signalling is upregulated in *gpr161* mutants, we assessed the  
156 expression of known Hh target genes in the neural tube by qRT-PCR and RNA *in situ* hybridisation.  
157 The Hh target genes *ptch2*, *gli1*, *nkx2.2b* and *nkx6.1* (Figure 3B) were all strongly upregulated, while

158 *pax7a*, which is repressed by Hh signalling (Guner and Karlstrom, 2007), was strongly downregulated  
159 in *gpr161* mutant compared to wild type embryos (Figure 3B). RNA in situ hybridisation revealed that  
160 expression of *shha*, the major Hh ligand expressed in the neural plate was not expanded in *gpr161*  
161 mutants (Figure 3A). However, expression of *ptch2*, a direct transcriptional target of Hh signalling  
162 (Concordet et al., 1996), was expanded in *gpr161* mutants (Figure 3A), suggesting that Hh signalling is  
163 upregulated in *gpr161* mutants downstream of Shh expression. Similarly, expression of *olig2*, a  
164 marker of motor neuron induction which depends on low-level Hh activity (Dessaud et al., 2007; Park  
165 et al., 2002), as well as *nkx2.2a*, a marker for V3 interneuron progenitor cells of the lateral floorplate  
166 (Barth and Wilson, 1995; Briscoe et al., 1999), were clearly expanded in the *gpr161* mutant neural  
167 tube (Figure 3A). We note that the expansion of the low-level target *olig2* appears to be stronger  
168 than the expansion of the high-level target *nkx2.2a* (Figure 3A). Taken together, these results show  
169 that loss of Gpr161 leads to a hyperactivation of the Hh signalling pathway in zebrafish.

170 In the zebrafish myotome, sustained Hh signalling during gastrulation and somitogenesis stages have  
171 been shown to be required for the specification of several cell types, including Prox1 and Eng double  
172 positive muscle pioneer cells (MPs) and Prox1 positive superficial slow fibres (SSFs) (Wolff et al.,  
173 2003). While medium-to-low level Hh signalling is sufficient for the specification of SSFs, the  
174 formation of MPs requires high levels of Hh (Wolff et al., 2003). Consistent with the expansion of Hh  
175 target genes in the neural tube, *gpr161* mutants also displayed an increase in both SSFs and MPs  
176 (Figure 3C). While zygotic Gpr161 loss of function resulted in a significant increase in both SSFs (from  
177  $22 \pm 2$  (mean  $\pm$ SD) in wt to  $33 \pm 5$  in zygotic *gpr161* mutants) and MPs (from  $4 \pm 1$  (mean  $\pm$  SD) in wt  
178 to  $7 \pm 2$  in zygotic *gpr161* mutants), complete loss of both maternal and zygotic Gpr161 led to a  
179 stronger increase in both SSFs and MPs ( $56 \pm 9$  (mean  $\pm$  s.d.) SSFs, and  $23 \pm 10$  MPs), consistent with  
180 the requirement for sustained Hh signalling in muscle cell development (Wolff et al., 2003). These  
181 results suggest that in the somites, loss of Gpr161 results in expansion of both high and low Hh  
182 signalling targets.

183 *gpr161* mutants remain sensitive to Shh

184 Our results suggest that although loss of Gpr161 function in zebrafish leads to increased Hh signalling  
185 activity, *gpr161* mutants display weaker phenotypes than those seen in mutants with maximal  
186 activation of Hh signalling. To determine whether Hh signalling could be further activated in *gpr161*  
187 mutants in response to Hh, we injected 50 or 100 pg *shh* mRNA, and assessed SSF and MP formation  
188 using Prox1 and Eng antibody staining as above (Figure 4A-B). In wild-type embryos, overexpression  
189 of 100 pg *shh* resulted in an approximate 1.8-fold increase in both MPs and SSFs (Figure 4B), a  
190 significant change from uninjected control embryos (ANOVA, SSFs  $p < 0.01$ , MPs  $p < 0.01$ ). In contrast,  
191 neither 50 nor 100 pg *shh* resulted in a significant increase in the number of SSFs in *gpr161* mutant

192 embryos (ANOVA, 50 pg  $p>0.9$ , 100 pg  $p>0.5$ ), suggesting that the number of SSFs have reached a  
193 maximum level in the uninjected mutants. Injection of 100 pg *shh* did, however, give a significant 1.9-  
194 fold increase in the number of MPs in *gpr161* mutant embryos (ANOVA,  $p<0.001$ ) (Figure 4B). Taken  
195 together, these results suggest that in the *gpr161* mutant, medium-to-low level Hh signalling targets  
196 are activated close to maximal levels, whereas high level targets of Hh signalling are increased, but  
197 not maximally so.

### 198 Activation of PKA rescues *gpr161* mutant phenotypes

199 Murine Gpr161 was proposed to act as a constitutively active  $G_{\alpha s}$ -coupled receptor, which  
200 contributes to maintain basal levels of PKA activity to keep the Hh pathway inactive (Mukhopadhyay  
201 et al., 2013). This model predicts that the phenotypes observed in the *gpr161* mutants are due to a  
202 loss of adenylate cyclase activity, and should be rescued by artificial activation of adenylate cyclase  
203 by agents such as forskolin. Previous studies have reported that 300  $\mu$ M forskolin phenocopies a  
204 complete loss of Hh signalling (Barresi et al., 2000). Consistent with this, treatment with 300  $\mu$ M  
205 forskolin resulted in a near complete loss of all MPs and SSFs in wild-type as well as *gpr161* mutant  
206 embryos (Figure 5A-B), consistent with the model that hyperactivation of Hh signalling in the *gpr161*  
207 mutants is due to a reduction of PKA activity. Treatment with lower concentrations of forskolin,  
208 ranging from 500 nM to 50  $\mu$ M, had only minor effects on somite development of wild-type embryos,  
209 but resulted in a significant degree of rescue of the *gpr161* mutant phenotype (Figure 5A-B). We note  
210 that MPs, which require high levels of Hh signalling, were more sensitive to forskolin concentrations  
211 than SSFs, which require low levels of Hh.

### 212 Distinct contributions of Gpr161 to basal repression of Hh signalling in different 213 tissues

214 To determine the epistatic relationship between Smo and Gpr161 in zebrafish, we used the zebrafish  
215 *smo* null allele *hi1640* (Chen et al., 2001) to generate zebrafish *gpr161b*<sup>-/-</sup>; *gpr161a*<sup>-/-</sup>; *smo*<sup>-/-</sup> triple  
216 mutants, and assessed Hh signalling activity using Prox1/Eng staining and neural tube markers, as  
217 above. Zebrafish *gpr161b*<sup>-/-</sup>; *gpr161a*<sup>-/-</sup>; *smo*<sup>-/-</sup> triple homozygous mutant embryos showed a  
218 morphological phenotype, as well as an expansion of both SSFs and MPs, that were indistinguishable  
219 from *gpr161b*<sup>-/-</sup>; *gpr161a*<sup>-/-</sup> double homozygous mutant embryos (Figure 6A-B, Figure 6 Supplement  
220 1), consistent with the reported phenotypes in the mouse *Gpr161;Smo* double mutants  
221 (Mukhopadhyay et al., 2013). Further, the expansion of low-level Hh target-genes *ptch2* and *olig2*  
222 was similarly found to be independent of Smo function (Figure 6C). In contrast, the double mutant  
223 *gpr161*<sup>-/-</sup>; *gpr161a*<sup>-/-</sup>; *smo*<sup>-/-</sup> triple mutant embryos showed no detectable *nkx2.2a* expression,  
224 suggesting that in the neural tube, though not in the somites, high level Hh target gene expression is  
225 dependent on Smo function in the absence of Gpr161.



## 226 Discussion

227 Hh signalling is tightly controlled at multiple levels in order to accurately translate morphogen  
228 gradients into graded transcriptional responses mediated by the Gli transcription factors. PKA both  
229 promotes formation of the Gli repressor forms and inhibits Gli activator forms, thereby controlling  
230 sensitivity to Hh ligands, and providing a filter for Hh signalling strength. How PKA activity is fine-  
231 tuned in Hh signalling is not completely understood. GPCRs such as Gpr161 have been shown to  
232 impact on Hh signalling by regulating PKA via the regulation of adenylate cyclase activity. To extend  
233 our understanding of how GPCRs regulate Hh signalling, we generated zebrafish *gpr161* mutants and  
234 analysed Hh-dependent signalling in the neural tube and the myotome.

235 The zebrafish genome contains two conserved Gpr161 orthologues, Gpr161a and Gpr161b. We have  
236 generated mutants for both orthologues, and show that Gpr161a and Gpr161b act redundantly in  
237 early zebrafish development. Zebrafish mutants lacking Gpr161 function show an expansion of Hh  
238 target gene expression both in the neural tube and in the somites, and develop severe craniofacial  
239 defects that are similar to those described for the *ptc1*<sup>-/-</sup>; *ptc2*<sup>-/-</sup> double mutants (Koudijs et al., 2008).  
240 These results confirm that the role of Gpr161 as a modulator of Hh signalling is conserved in the  
241 vertebrate lineage.

242 Gpr161 was proposed to contribute to the basal Hh repression machinery by activating G<sub>αs</sub> and  
243 adenylate cyclase, resulting in activation of PKA, and overexpression of murine Gpr161 was shown to  
244 lead to a general increase in intracellular cAMP levels (Mukhopadhyay et al., 2013). However, direct  
245 evidence for reduced cAMP production in Gpr161 mutant cells is hampered by the difficulties in  
246 measuring physiological cAMP levels in specific subcellular compartments such as the primary cilium.  
247 We have taken advantage of the zebrafish embryo's amenability to pharmacological treatments to  
248 further probe the mechanism of Gpr161 action. Consistent with the model that loss of Gpr161 leads  
249 to lowered cAMP levels and reduced PKA activity, we found that treatment with the cAMP elevating  
250 agent forskolin fully rescued muscle cell specification in the *gpr161* mutant embryos. Interestingly, a  
251 100-fold concentration range (0.5-50 μM) of forskolin gave very similar near-complete rescue of both  
252 mutant morphology and molecular read-outs of both high and low level Hh target gene expression in  
253 the somites, suggesting that additional mechanisms may be in place to ensure appropriate regulation  
254 of PKA activity in the presence of excess cAMP. Previous studies have reported that loss of Gpr161  
255 may also affect other signalling pathways in addition to Hh signalling (Li et al., 2015; Mukhopadhyay  
256 et al., 2013). While we cannot rule out a role for Gpr161 in processes not related to Hh signalling, our  
257 results suggest that loss of Gpr161 function can be fully compensated by artificial activation of  
258 adenylate cyclase.



259 A comparison of phenotypes suggests that the upregulation of Hh signalling in zebrafish *gpr161*  
260 mutants is less severe than that seen in *ptc1<sup>-/-</sup>; ptc2<sup>-/-</sup>* mutant embryos (Koudijs et al., 2005). Similarly,  
261 injection of a dominant-negative form of PKA resulted in an apparently stronger increase in Hh-  
262 dependent muscle cell specification in the myotome than could be observed in the *gpr161* mutants  
263 (Zhao et al., 2016). This is consistent with data obtained in mice, where a loss of PKA or  $G_{\alpha s}$  leads to  
264 more severe ventralisation of the neural tube than what is observed in the *Gpr161* mutants  
265 (Mukhopadhyay et al., 2013; Pusapati et al., 2018; Regard et al., 2013; Tuson et al., 2011). Further  
266 supporting the idea that Hh signalling is not maximally activated in the *gpr161* mutants, we find that  
267 injection of *shha* mRNA can further increase high, but not low, level Hh targets in the somites of  
268 *gpr161* mutants. Thus we conclude that whereas low level Hh signalling is maximally active in the  
269 *gpr161* mutants, additional mechanisms contribute to PKA activation to control high level Hh  
270 signalling in the absence of Gpr161 function.

271 Importantly, we also show that low level Hh signalling in the neural tube of *gpr161* mutants is  
272 independent of Smo, whereas expression of the high level Hh target gene *nkx2.2a* clearly requires  
273 Smo function. Our results are consistent with the model that  $G_{\alpha s}$ -coupling and activation by Gpr161 is  
274 one of several mechanisms that contribute to the mobilisation of compartmentalised cAMP to  
275 repress Hh target activation, and that the reduction in cAMP levels caused by loss of Gpr161 is  
276 sufficient to cause constitutive, Smo-independent activation of low, but not high level Hh signalling.  
277 This result provides genetic evidence to support the model based on results from pharmacological  
278 inhibition of Smo in mammalian cell culture (Pusapati et al., 2018). Similar experiments were  
279 performed in the mouse *Gpr161* mutant, with the conclusion that Gpr161 is largely epistatic to Smo  
280 (Mukhopadhyay et al., 2013). These authors do however note that the expression of high level Hh  
281 target genes, such as *Nkx2.2* and *FoxA2*, is reduced in *Smo; Gpr161* double mutants compared to  
282 *Gpr161* single mutants. One possibility is that this difference is due to the different assays used to  
283 assess Hh target gene expression in mouse and zebrafish neural tubes. Whereas Mukhopadhyay and  
284 colleagues used immunohistochemistry to detect Hh target gene expression (Mukhopadhyay et al.,  
285 2013), our results are based on chromogenic in situ hybridisation, a far less sensitive assay. Thus, we  
286 can not rule out that some low level *nkx2.2a* expression persists in the zebrafish triple mutants.  
287 Another possibility is that there could be species-specific differences in the roles of GliR and GliA  
288 and/or cAMP levels, or alternatively, Gpr161 may make a relatively larger contribution to cAMP  
289 levels in the zebrafish neural tube compared to mouse. Interestingly, we do observe tissue-specific  
290 differences in zebrafish in our epistasis experiments. In the *gpr161* mutant myotome, both high and  
291 low level Hh signalling outcomes are independent of Smo, suggesting that in the somites Gpr161 is  
292 completely epistatic to Smo. We suggest that in the neural tube, additional unknown factors make  
293 significant contributions to promote basal cAMP levels, whereas in the zebrafish myotome, Gpr161

294 alone may account for the largest part of the basal repression machinery. Thus, distinct combinations  
295 of GPCRs in different cell types can contribute to complex and tissue-specific regulation of Hh  
296 signalling. The identification of these additional GPCRs, as well as other factors that control PKA  
297 activity downstream of adenylate cyclases, will be required to understand how Hh signalling is fine-  
298 tuned to orchestrate the great variety of Hh-dependent biological processes in a cell type specific  
299 manner.

## 300 **Materials and Methods**

### 301 CRISPR/cas9 genome editing and genotyping

302 Guide RNAs for CRISPR/cas9 mediated knockout of both *gpr161a* (ENSDART00000151311.2) and  
303 *gpr161b* (ENSDART00000078051.6) were designed using the ChopChop web tool (Montague et al.,  
304 2014) and synthesised as described previously (Huang et al., 2014). Embryos were injected with 50  
305 pg of gene specific sgRNA and 300pg of *cas9* mRNA at 1-cell stage. F0 founder fish were identified by  
306 T7 Endonuclease I digests of gene-specific PCR products from pooled genomic DNA obtained from F1  
307 offspring, following the manufacturer's protocol (NEB, #M0302L). While the *gpr161a<sup>ml200</sup>* allele  
308 harbors an 8bp deletion, the introduced mutation in *gpr161<sup>ml201</sup>* leads to a 6bp insertion, which were  
309 identified by running out gene specific PCR products (see Table 2) on 4% agarose gels. Genotyping of  
310 the *smo<sup>hi1640</sup>* allele was performed as described previously (Chung and Stainier, 2008).

### 311 Zebrafish lines and husbandry

312 All zebrafish lines including SAT wildtype strains were kept at 28°C according to standard protocols.

313 MZ*gpr161b<sup>-/-</sup>*; *gpr161a<sup>-/-</sup>* embryos were obtained by performing in-crosses of a *gpr161b<sup>-/-</sup>*; *gpr161a<sup>+/-</sup>*  
314 line. Embryos were raised at 28°C and staged by morphology (Kimmel et al., 1995).

315 All experimental protocols concerning zebrafish were approved by the Austrian Ministry for Science  
316 and Research (BMFWF-66.008/0016-WF/V/3b/2016, BMBWF-66.008/0015-V/3b/2018), and  
317 experiments were carried out in accordance with approved guidelines.

### 318 Construction of plasmids

319 To generate expression-vectors for *gpr161a* and *gpr161b* the coding sequence of both genes were  
320 amplified with overlapping primers (see Table 2) using homemade PfuX7 polymerase (Nørholm,  
321 2010) and fused in-frame to a Myc-Tag into pCS2+ by *in vivo* Assembly (IVA) cloning (García-Nafría et  
322 al., 2016).

### 323 Quantitative (q) RT-PCR

324 RNA was isolated from zebrafish embryos with Trizol (Ambion) following the manufacturer's  
325 instructions. RNA integrity was checked by agarose gel electrophoresis and the concentration was  
326 measured using a Nanodrop 2000c (Thermo) spectrophotometer.

327 Complementary DNA was transcribed from equal amounts of dsDNase-treated total RNA using the  
328 Maxima RT kit for qPCR (Thermo) with dsDNase according to the manufacturer's instructions.

329 RT-qPCRs were performed using 5x HOT FIREPol EvaGreen qPCR Supermix (Solis Biotyne) and  
330 contained each primer at 250nM and cDNA corresponding to a total RNA amount of 15 ng for pooled  
331 embryos or 5 ng for single embryos. PCRs were run on a CFX96 Connect (BioRad) under following  
332 conditions: 12 min 95°C, 40 cycles of 95°C for 30s, 60°C for 30s and 72°C for 20s. Melt curves were  
333 recorded from 65°C to 95°C in 0.5°C increments. Data was acquired using CFX Manager 3.1 (BioRad)  
334 and exported as RDML files for processing.

335 Data analysis was performed in R version 3.4.4. Fluorescence data were imported using the package  
336 RDML (Rödiger et al., 2017) and amplification curves fitted using the 'cm3' model (Carr and Moore,  
337 2012) implemented in the package qpcR (Ritz and Spiess, 2008). The first derivative (d0) of the model  
338 was used as expression value. Expression values for genes of interest were normalised using the  
339 geometric mean of the expression values of the reference genes *eef1aa* and *rpl13*.

### 340 Whole-mount in situ hybridisation

341 In situ hybridisation was performed following standard protocols. DIG-labelled antisense probes  
342 were made for *shha* (Krauss et al., 1993), *ptch2* (Concordet et al., 1996), *olig2* (Park et al., 2002) and  
343 *nkx2.2a* (Barth and Wilson, 1995).

### 344 Immunohistochemistry

345 Embryos were fixed in 4% paraformaldehyde at room temperature for 3h, then washed in PBS-Triton  
346 (PBS + 0.3% Triton X-100). After 1h of incubation in blocking solution (PBS-Triton, 4% BSA, 0.02%  
347 NaN<sub>3</sub>) at 4°C, primary antibodies diluted in blocking solution were added and left over night for  
348 incubation at 4°C. After subsequent washes in PBS-Triton embryos were incubated with appropriate  
349 Alexa conjugated secondary antibodies over night at 4°C. Again, Embryos were washed several times  
350 in PBS-Triton and mounted in Mowiol embedding medium for imaging. For a list of the antibodies  
351 used in this study, see Supplementary Table 1. All stainings were imaged using a Zeiss Axio  
352 Observer.Z1 microscope equipped with a Yokogawa CSU-X1 spinning disc confocal unit using 25x, or  
353 63x water-immersion lenses.

## 354 Chemical treatments

355 For chemical treatments embryos were dechorionated at 50% epiboly and transferred to agar-coated  
356 35mm dishes containing forskolin (Biomol) at final concentrations between 0.5 and 300  $\mu$ M in 1%  
357 DMSO. Control experiments were performed simultaneously in 1% DMSO. All embryos were treated  
358 until 24 hpf.

## 359 Microinjection

360 mRNA was synthesised using the HiScribe SP6 RNA Synthesis Kit (NEB) and capped using the Vaccinia  
361 Capping System (NEB) following the protocols provided by the manufacturer. Embryos were injected  
362 at one-cell stage. Injected volumes are indicated in the respective figures.

## 363 Light Histology

364 Three day old (72 hpf) wild type and *gpr161* mutant embryos were fixed in 2.5% glutaraldehyde in  
365 0.01M sodium cacodylate buffer for two hours, washed in buffer, dehydrated in an increasing  
366 acetone series and embedded in EMBED 812 epoxy resin. After polymerisation for 48 hours at 60°C,  
367 embryos were cut serially with an Autocut 5020 (Reichert, Austria) and a Diatome Butler knife  
368 (Diatome, Switzerland). 2  $\mu$ m thick serial sections were stained according to Richardson (Richardson  
369 et al., 1960) for 10 minutes, washed, and mounted in cedarwood oil. Images were taken with a Leica  
370 DM5000B microscope using a Leica DFC 490 digital camera and Leica application suite v. 4.8 (Leica,  
371 Germany).

## 372 Electron microscopy

373 Embryos were fixed with 2.5% glutaraldehyde in 0.01M sodium cacodylate buffer containing 5%  
374 sucrose at 4°C for two hours. After washing in cacodylate buffer, specimens were post fixed in  
375 reduced osmium (2% osmium tetroxide and 3% potassium ferrocyanide in 0.1M cacodylate buffer)  
376 for two hours at 4°C, dehydrated in an ethanol series, critical point dried with an EMS 850 CPD  
377 (Electron Microscopy Services, Germany), mounted and 20 nm gold sputtered with a CCU-010  
378 sputter coater (Safematic, Switzerland), and examined with a DSM950 scanning electron microscope  
379 (Zeiss, Germany). Images were taken with a Pentax digital camera and PK\_Tether 0.7.0 free software.

## 380 Data Presentation and Analysis

381 All data presented in this study were analyzed with R using the RStudio integrated development  
382 environment and plotted using the “ggplot2” package (Rstudio Team, 2016; Wickham, 2016).

383 Statistical significance of differences in expression levels between groups were calculated on at least  
384 three biological replicates with the Wilcoxon rank sum test, corrected for multiple comparisons using  
385 the Benjamini-Hochberg FDR method.

386 Statistical significance of a difference in MP or SSF numbers between groups was determined using  
387 one-way ANOVA corrected for unequal variances and the Games-Howell post-hoc test for pairwise  
388 comparison as implemented in the “userfriendlyscience” package (Peters, 2017). P values are  
389 indicated as follows: \*  $p < 0.05$ ; \*\*  $p < 0.01$ ;  $p < 0.001$ ; ns not significant. Sample sizes (N) are given in  
390 the respective figure legends.

## 391 **Acknowledgements**

392 We are grateful to Dzenana Tufegdžić for fish care, and to Dirk Meyer, Robin Kimmel and Kathi Klee  
393 for helpful discussions and/or comments on the manuscript. This work was supported by funding  
394 from the Austrian Science Fund (FWF) and the Tyrolean Science Fund (TWF) (FWF P27338 (to P.A.),  
395 FWF P30441 (to E.S.), TWF 236277 (to D.R.)).

## 396 **Competing interests**

397 The authors declare they have no competing interests.

## 398 **References**

- 399 Ayers KL, Théron PP. 2010. Evaluating Smoothed as a G-protein-coupled receptor for Hedgehog  
400 signalling. *Trends Cell Biol* **20**:287–298. doi:10.1016/j.tcb.2010.02.002
- 401 Bachmann VA, Mayrhofer JE, Ilouz R, Tschalkner P, Raffener P, Röck R, Courcelles M, Apelt F, Lu T-W,  
402 Baillie GS, Thibault P, Aanstad P, Stelzl U, Taylor SS, Stefan E. 2016. Gpr161 anchoring of PKA  
403 consolidates GPCR and cAMP signaling. *Proc Natl Acad Sci* **113**:7786–7791.  
404 doi:10.1073/pnas.1608061113
- 405 Barresi MJ, Stickney HL, Devoto SH. 2000. The zebrafish slow-muscle-omitted gene product is  
406 required for Hedgehog signal transduction and the development of slow muscle identity.  
407 *Development* **127**:2189–2199.
- 408 Barth KA, Wilson SW. 1995. Expression of zebrafish nk2.2 is influenced by sonic hedgehog/vertebrate  
409 hedgehog-1 and demarcates a zone of neuronal differentiation in the embryonic forebrain.  
410 *Development* **121**:1755–1768.
- 411 Briscoe J, Sussel L, Serup P, Hartigan-O’Connor D, Jessell TM, Rubenstein JLR, Ericson J. 1999.  
412 Homeobox gene Nkx2.2 and specification of neuronal identity by graded Sonic hedgehog  
413 signalling. *Nature* **398**:622–627. doi:10.1038/19315
- 414 Briscoe J, Théron PP. 2013. The mechanisms of Hedgehog signalling and its roles in development  
415 and disease. *Nat Rev Mol Cell Biol* **14**:416–429.
- 416 Carr AC, Moore SD. 2012. Robust Quantification of Polymerase Chain Reactions Using Global Fitting.

- 417 *PLoS One* **7**:e37640. doi:10.1371/journal.pone.0037640
- 418 Chen W, Burgess S, Hopkins N. 2001. Analysis of the zebrafish smoothed mutant reveals conserved  
419 and divergent functions of hedgehog activity. *Development* **128**:2385–2396.
- 420 Chung W-S, Stainier DYR. 2008. Intra-Endodermal Interactions Are Required for Pancreatic  $\beta$  Cell  
421 Induction. *Dev Cell* **14**:582–593. doi:10.1016/j.devcel.2008.02.012
- 422 Concordet JP, Lewis KE, Moore JW, Goodrich L V, Johnson RL, Scott MP, Ingham PW. 1996. Spatial  
423 regulation of a zebrafish patched homologue reflects the roles of sonic hedgehog and protein  
424 kinase A in neural tube and somite patterning. *Development* **122**:2835–46.
- 425 Corbit KC, Aanstad P, Singla V, Norman AR, Stainier DYR, Reiter JF. 2005. Vertebrate Smoothened  
426 functions at the primary cilium. *Nature* **437**:1018–1021. doi:10.1038/nature04117
- 427 Dessaud E, Yang LL, Hill K, Cox B, Ulloa F, Ribeiro A, Mynett A, Novitsch BG, Briscoe J. 2007.  
428 Interpretation of the sonic hedgehog morphogen gradient by a temporal adaptation  
429 mechanism. *Nature* **450**:717–720. doi:10.1038/nature06347
- 430 Edgar RC. 2004. MUSCLE: multiple sequence alignment with high accuracy and high throughput.  
431 *Nucleic Acids Res* **32**:1792–1797. doi:10.1093/nar/gkh340
- 432 García-Nafria J, Watson JF, Greger IH. 2016. IVA cloning: A single-tube universal cloning system  
433 exploiting bacterial In Vivo Assembly. *Sci Rep* **6**:27459. doi:10.1038/srep27459
- 434 Guner B, Karlstrom RO. 2007. Cloning of zebrafish *nkx6.2* and a comprehensive analysis of the  
435 conserved transcriptional response to Hedgehog/Gli signaling in the zebrafish neural tube. *Gene*  
436 *Expr Patterns* **7**:596–605. doi:10.1016/j.modgep.2007.01.002
- 437 Hammerschmidt M, Bitgood MJ, McMahon AP. 1996. Protein kinase A is a common negative  
438 regulator of Hedgehog signaling in the vertebrate embryo. *Genes Dev* **10**:647–658.  
439 doi:10.1101/gad.10.6.647
- 440 Huang P, Ahkmetova L, Schier AF, Zimmerman S, Pauli A, Thyme SB, Gagnon JA, Montague TG,  
441 Richter C, Valen E. 2014. Efficient mutagenesis by Cas9 protein-mediated oligonucleotide  
442 insertion and large-scale assessment of single-guide RNAs. *PLoS One* **9**:e98186.  
443 doi:10.1371/journal.pone.0098186
- 444 Hui C-C, Angers S. 2011. Gli proteins in development and disease. *Annu Rev Cell Dev Biol* **27**:513–537.  
445 doi:10.1146/annurev-cellbio-092910-154048
- 446 Humke EW, Dorn K V, Milenkovic L, Scott MP, Rohatgi R. 2010. The output of Hedgehog signaling is  
447 controlled by the dynamic association between Suppressor of Fused and the Gli proteins. *Genes*

- 448 *Dev* **24**:670–682. doi:10.1101/gad.1902910
- 449 Hwang S-H, White KA, Somatilaka BN, Shelton JM, Richardson JA, Mukhopadhyay S. 2018. The G  
450 protein-coupled receptor Gpr161 regulates forelimb formation, limb patterning and skeletal  
451 morphogenesis in a primary cilium-dependent manner. *Development* **145**:dev154054.  
452 doi:10.1242/dev.154054
- 453 Ingham PW, Nakano Y, Seger C. 2011. Mechanisms and functions of Hedgehog signalling across the  
454 metazoa. *Nat Rev Genet* **12**:393–406.
- 455 Jiang J, Hui C. 2008. Hedgehog Signaling in Development and Cancer. *Dev Cell* **15**:801–812.  
456 doi:10.1016/j.devcel.2008.11.010
- 457 Kimmel CB, Ballard WW, Kimmel SR, Ullmann B, Schilling TF. 1995. Stages of embryonic development  
458 of the zebrafish. *Dev Dyn* **203**:253–310. doi:10.1002/aja.1002030302
- 459 Klein RS, Rubin JB, Gibson HD, DeHaan EN, Alvarez-Hernandez X, Segal RA, Luster AD. 2001. SDF-1  
460 alpha induces chemotaxis and enhances Sonic hedgehog-induced proliferation of cerebellar  
461 granule cells. *Development* **128**:1971–81.
- 462 Koudijs MJ, den Broeder MJ, Groot E, van Eeden FJ. 2008. Genetic analysis of the two zebrafish  
463 patched homologues identifies novel roles for the hedgehog signaling pathway. *BMC Dev Biol*  
464 **8**:15. doi:10.1186/1471-213X-8-15
- 465 Koudijs MJ, den Broeder MJ, Keijser A, Wienholds E, Houwing S, van Rooijen EMHC, Geisler R, van  
466 Eeden FJM. 2005. The Zebrafish Mutants dre, uki, and lep Encode Negative Regulators of the  
467 Hedgehog Signaling Pathway. *PLoS Genet* **1**:e19. doi:10.1371/journal.pgen.0010019
- 468 Krauss S, Concordet J-P, Ingham PW. 1993. A functionally conserved homolog of the Drosophila  
469 segment polarity gene hh is expressed in tissues with polarizing activity in zebrafish embryos.  
470 *Cell* **75**:1431–1444. doi:10.1016/0092-8674(93)90628-4
- 471 Li BI, Matteson PG, Ababon MF, Nato AQ, Lin Y, Nanda V, Matisse TC, Millonig JH. 2015. The orphan  
472 GPCR, Gpr161, regulates the retinoic acid and canonical Wnt pathways during neurulation. *Dev*  
473 *Biol* **402**:17–31. doi:10.1016/j.ydbio.2015.02.007
- 474 Marks SA, Kalderon D. 2011. Regulation of mammalian Gli proteins by Costal 2 and PKA in Drosophila  
475 reveals Hedgehog pathway conservation. *Development* **138**:2533–2542.  
476 doi:10.1242/dev.063479
- 477 Montague TG, Cruz JM, Gagnon JA, Church GM, Valen E. 2014. CHOPCHOP: a CRISPR/Cas9 and TALEN  
478 web tool for genome editing. *Nucleic Acids Res* **42**:W401–W407. doi:10.1093/nar/gku410



- 479 Mukhopadhyay S, Wen X, Ratti N, Loktev A, Rangell L, Scales SJ, Jackson PK. 2013. The ciliary G-  
480 protein-coupled receptor Gpr161 negatively regulates the Sonic hedgehog pathway via cAMP  
481 signaling. *Cell* **152**:210–223. doi:10.1016/j.cell.2012.12.026
- 482 Niewiadomski P, Kong JH, Ahrends R, Ma Y, Humke EW, Khan S, Teruel MN, Novitch BG, Rohatgi R.  
483 2014. Gli Protein Activity Is Controlled by Multisite Phosphorylation in Vertebrate Hedgehog  
484 Signaling. *Cell Rep* **6**:168–181. doi:10.1016/j.celrep.2013.12.003
- 485 Niewiadomski P, Niedziółka SM, Markiewicz Ł, Uśpieński T, Baran B, Chojnowska K. 2019. Gli  
486 Proteins: Regulation in Development and Cancer. *Cells* **8**:147. doi:10.3390/cells8020147
- 487 Nørholm MH. 2010. A mutant Pfu DNA polymerase designed for advanced uracil-excision DNA  
488 engineering. *BMC Biotechnol* **10**:21. doi:10.1186/1472-6750-10-21
- 489 Ogden SK, Fei DL, Schilling NS, Ahmed YF, Hwa J, Robbins DJ. 2008. G protein Gai functions  
490 immediately downstream of Smoothed in Hedgehog signalling. *Nature* **456**:967–970.  
491 doi:10.1038/nature07459
- 492 Pal K, Hwang S, Somatilaka B, Badgandi H, Jackson PK, DeFea K, Mukhopadhyay S. 2016. Smoothed  
493 determines  $\beta$ -arrestin-mediated removal of the G protein-coupled receptor Gpr161 from the  
494 primary cilium. *J Cell Biol* **212**:861–875. doi:10.1083/jcb.201506132
- 495 Pan Y, Wang C, Wang B. 2009. Phosphorylation of Gli2 by protein kinase A is required for Gli2  
496 processing and degradation and the Sonic Hedgehog-regulated mouse development. *Dev Biol*  
497 **326**:177–189. doi:10.1016/j.ydbio.2008.11.009
- 498 Park H-C, Mehta A, Richardson JS, Appel B. 2002. olig2 Is Required for Zebrafish Primary Motor  
499 Neuron and Oligodendrocyte Development. *Dev Biol* **248**:356–368.  
500 doi:10.1006/DBIO.2002.0738
- 501 Peters G-JY. 2017. userfriendlyscience: Quantitative analysis made accessible. *R Packag version 06-1*.  
502 doi:10.17605/OSF.IO/TXEQU
- 503 Pusapati G V., Kong JH, Patel BB, Gouti M, Sagner A, Sircar R, Luchetti G, Ingham PW, Briscoe J,  
504 Rohatgi R. 2018. G protein-coupled receptors control the sensitivity of cells to the morphogen  
505 Sonic Hedgehog. *Sci Signal* **11**:1–16. doi:10.1126/scisignal.aao5749
- 506 Raleigh DR, Reiter JF. 2019. Misactivation of Hedgehog signaling causes inherited and sporadic  
507 cancers. *J Clin Invest*. doi:10.1172/JCI120850
- 508 Regard JB, Malhotra D, Gvozdenovic-Jeremic J, Josey M, Chen M, Weinstein LS, Lu J, Shore EM,  
509 Kaplan FS, Yang Y. 2013. Activation of Hedgehog signaling by loss of GNAS causes heterotopic

- 510 ossification. *Nat Med* **19**:1505–12. doi:10.1038/nm.3314
- 511 Richardson KC, Jarett L, Finke EH. 1960. Embedding in epoxy resins for ultrathin sectioning in electron  
512 microscopy. *Biotech Histochem* **35**:313–323. doi:10.3109/10520296009114754
- 513 Riobo NA, Saucy B, DiLizio C, Manning DR. 2006. Activation of heterotrimeric G proteins by  
514 Smoothened. *Proc Natl Acad Sci* **103**:12607–12612. doi:10.1073/pnas.0600880103
- 515 Ritz C, Spiess A-N. 2008. qpcR: an R package for sigmoidal model selection in quantitative real-time  
516 polymerase chain reaction analysis. *Bioinformatics* **24**:1549–1551.  
517 doi:10.1093/bioinformatics/btn227
- 518 Rödiger S, Burdukiewicz M, Spiess A-N, Blagodatskikh K. 2017. Enabling reproducible real-time  
519 quantitative PCR research: the RDML package. *Bioinformatics* **33**:4012–4014.  
520 doi:10.1093/bioinformatics/btx528
- 521 Rstudio Team. 2016. RStudio: Integrated development for R. RStudio, Inc., Boston MA. *RStudio*.
- 522 Schmitt EA, Dowling JE. 1999. Early retinal development in the zebrafish, *Danio rerio*: Light and  
523 electron microscopic analyses. *J Comp Neurol* **404**:515–536. doi:10.1002/(SICI)1096-  
524 9861(19990222)404:4<515::AID-CNE8>3.0.CO;2-A
- 525 Shimada IS, Hwang S-HH, Somatilaka BN, Wang X, Skowron P, Kim J, Kim M, Shelton JM, Rajaram V,  
526 Xuan Z, Taylor MD, Mukhopadhyay S. 2018. Basal Suppression of the Sonic Hedgehog Pathway  
527 by the G-Protein-Coupled Receptor Gpr161 Restricts Medulloblastoma Pathogenesis. *Cell Rep*  
528 **22**:1169–1184. doi:10.1016/j.celrep.2018.01.018
- 529 Singh J, Wen X, Scales SJ. 2015. The orphan G protein-coupled receptor Gpr175 (Tpra40) enhances  
530 Hedgehog signaling by modulating cAMP levels. *J Biol Chem*. doi:10.1074/jbc.M115.665810
- 531 Stückemann T, Wegleiter T, Stefan E, Nägele O, Tarbashevich K, Böck G, Raz E, Aanstad P. 2012.  
532 Zebrafish *Cxcr4a* determines the proliferative response to Hedgehog signalling. *Development*  
533 **139**:2711–2720.
- 534 Torres-Quesada O, Mayrhofer JE, Stefan E. 2017. The many faces of compartmentalized PKA  
535 signalosomes. *Cell Signal* **37**:1–11. doi:10.1016/j.cellsig.2017.05.012
- 536 Tuson M, He MM, Anderson K V. 2011. Protein kinase A acts at the basal body of the primary cilium  
537 to prevent Gli2 activation and ventralization of the mouse neural tube. *Development* **138**:4921–  
538 4930. doi:10.1242/dev.070805
- 539 Wang B, Fallon JF, Beachy PA. 2000. Hedgehog-Regulated Processing of Gli3 Produces an  
540 Anterior/Posterior Repressor Gradient in the Developing Vertebrate Limb. *Cell* **100**:423–434.

541 doi:10.1016/S0092-8674(00)80678-9

542 Whitfield TT, Granato M, van Eeden FJ, Schach U, Brand M, Furutani-Seiki M, Haffter P,  
543 Hammerschmidt M, Heisenberg CP, Jiang YJ, Kane DA, Kelsh RN, Mullins MC, Odenthal J,  
544 Nüsslein-Volhard C. 1996. Mutations affecting development of the zebrafish inner ear and  
545 lateral line. *Development* **123**:241–54. doi:10.1016/S1350-9462(98)00010-X

546 Wickham H. 2016. *ggplot2: Elegant Graphics for Data Analysis, Use R!* Springer-Verlag New York.  
547 doi:10.1007/978-3-319-24277-4

548 Wolff C, Roy S, Ingham PW. 2003. Multiple muscle cell identities induced by distinct levels and timing  
549 of Hedgehog activity in the zebrafish embryo. *Curr Biol* **13**:1169–1181. doi:10.1016/S0960-  
550 9822(03)00461-5

551 Zhao Z, Lee RTH, Pusapati G V, Iyu A, Rohatgi R, Ingham PW. 2016. An essential role for Grk2 in  
552 Hedgehog signalling downstream of Smoothened. *EMBO Rep* **17**:739–752.  
553 doi:10.15252/embr.201541532

554

555 **Figures**

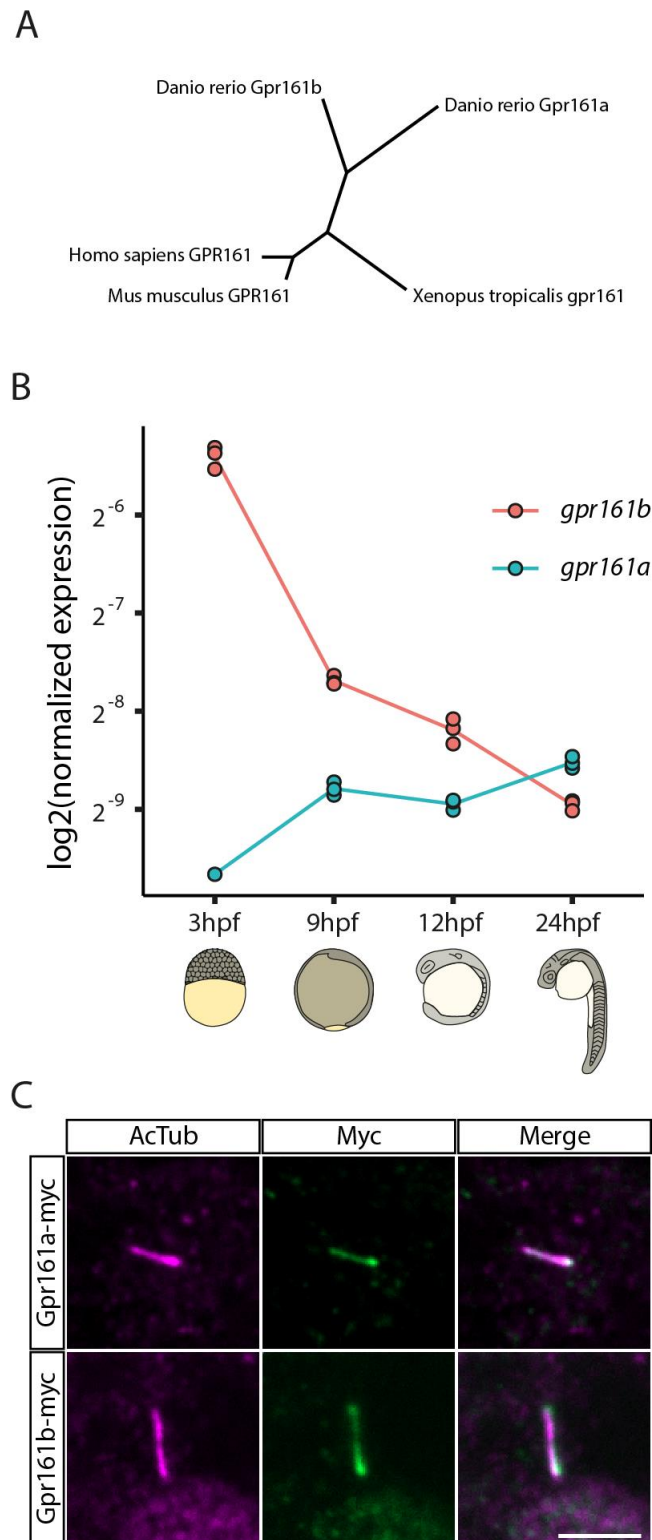

556

557 **Figure 1. Gpr161 is a conserved ciliary GPCR. (A)** Un-rooted cladogram showing the relation between Gpr161 protein

558 sequences of selected organisms. **(B)** *gpr161a* and *gpr161b* transcript levels at different stages of development analysed in

559 whole embryo lysates in triplicates using RT-qPCR. **(C)** Wildtype embryos were injected with *gpr161a-myc* or *gpr161b-myc*

560 mRNA at one-cell stage and fixed at 9 hpf before immunostaining for acetylated tubulin (AcTub; purple), a marker for the

561 ciliary axoneme and Myc (green) (scale bar: 5µm).

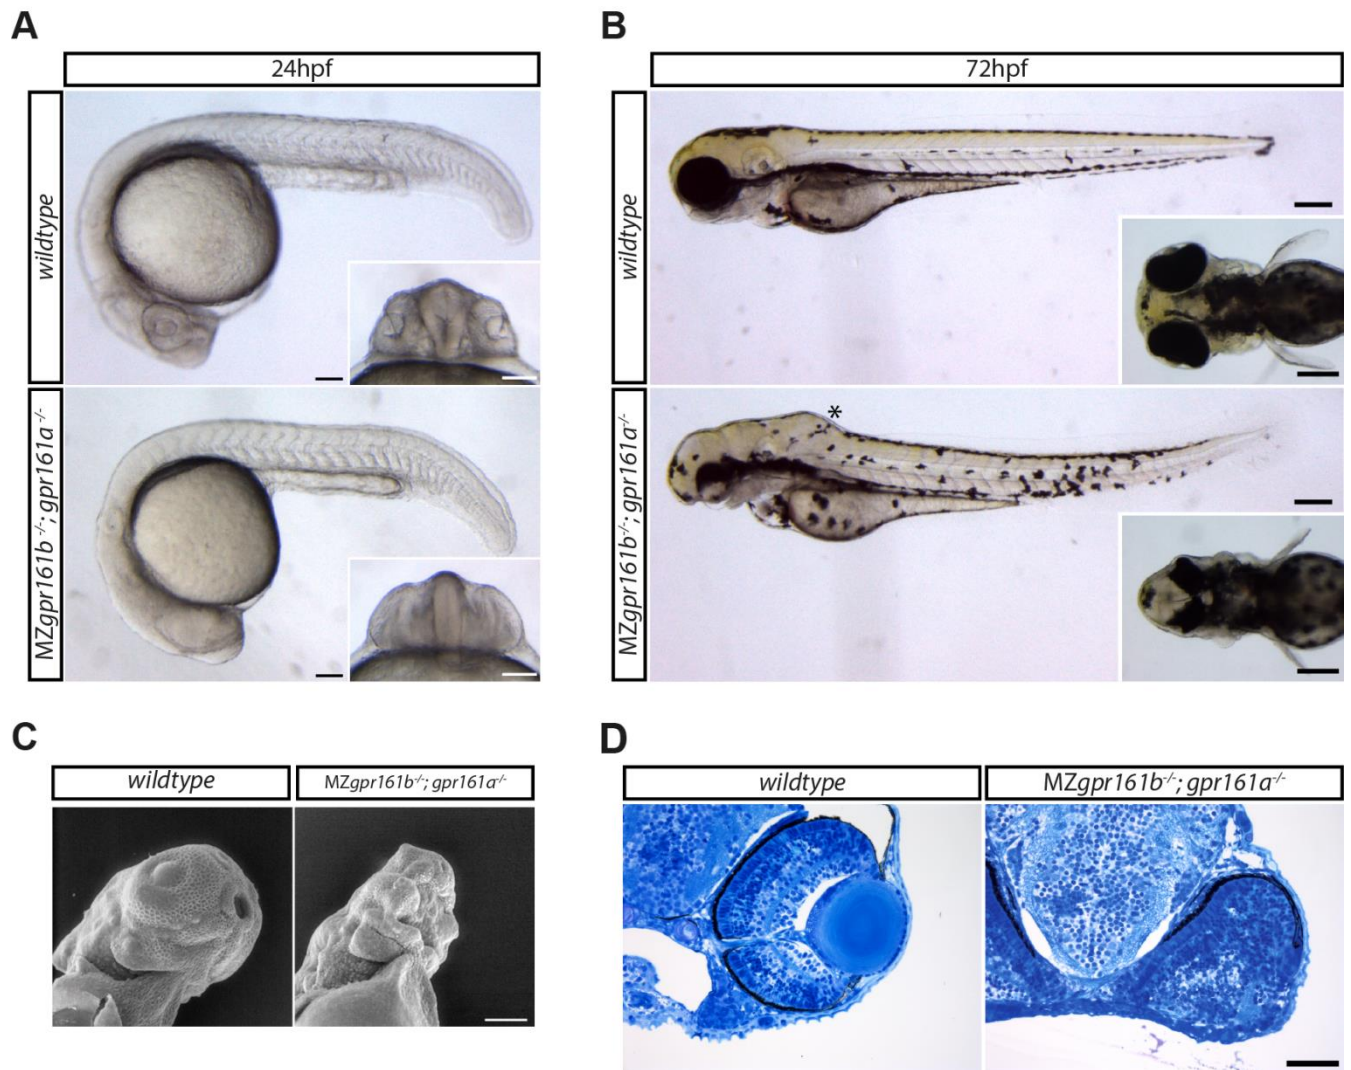

562

563 **Figure 2. Gpr161 is essential during embryonic development.** (A) Lateral view of wildtype and MZgpr161b<sup>-/-</sup>; gpr161a<sup>-/-</sup>  
564 embryos at 24 hpf (scale bars: 100µm); Insets: ventral view of the developing eyes. (B) Wildtype and MZgpr161b<sup>-/-</sup>;  
565 gpr161a<sup>-/-</sup> embryos at 72 hpf; Asterisk indicates swollen hindbrain (scale bars: 200µm); Insets: dorsal view of the head (C)  
566 Ventrolateral-view of the craniofacial region of wildtype and MZgpr161b<sup>-/-</sup>; gpr161a<sup>-/-</sup> embryos at 72 hpf taken by scanning  
567 electron microscopy (scale bar: 100µm). (D) Transverse semi-thin sections of the eye in wildtype and MZgpr161b<sup>-/-</sup>;  
568 gpr161a<sup>-/-</sup> embryos fixed at 72 hpf (Richardson staining, scale bars: 50µm).



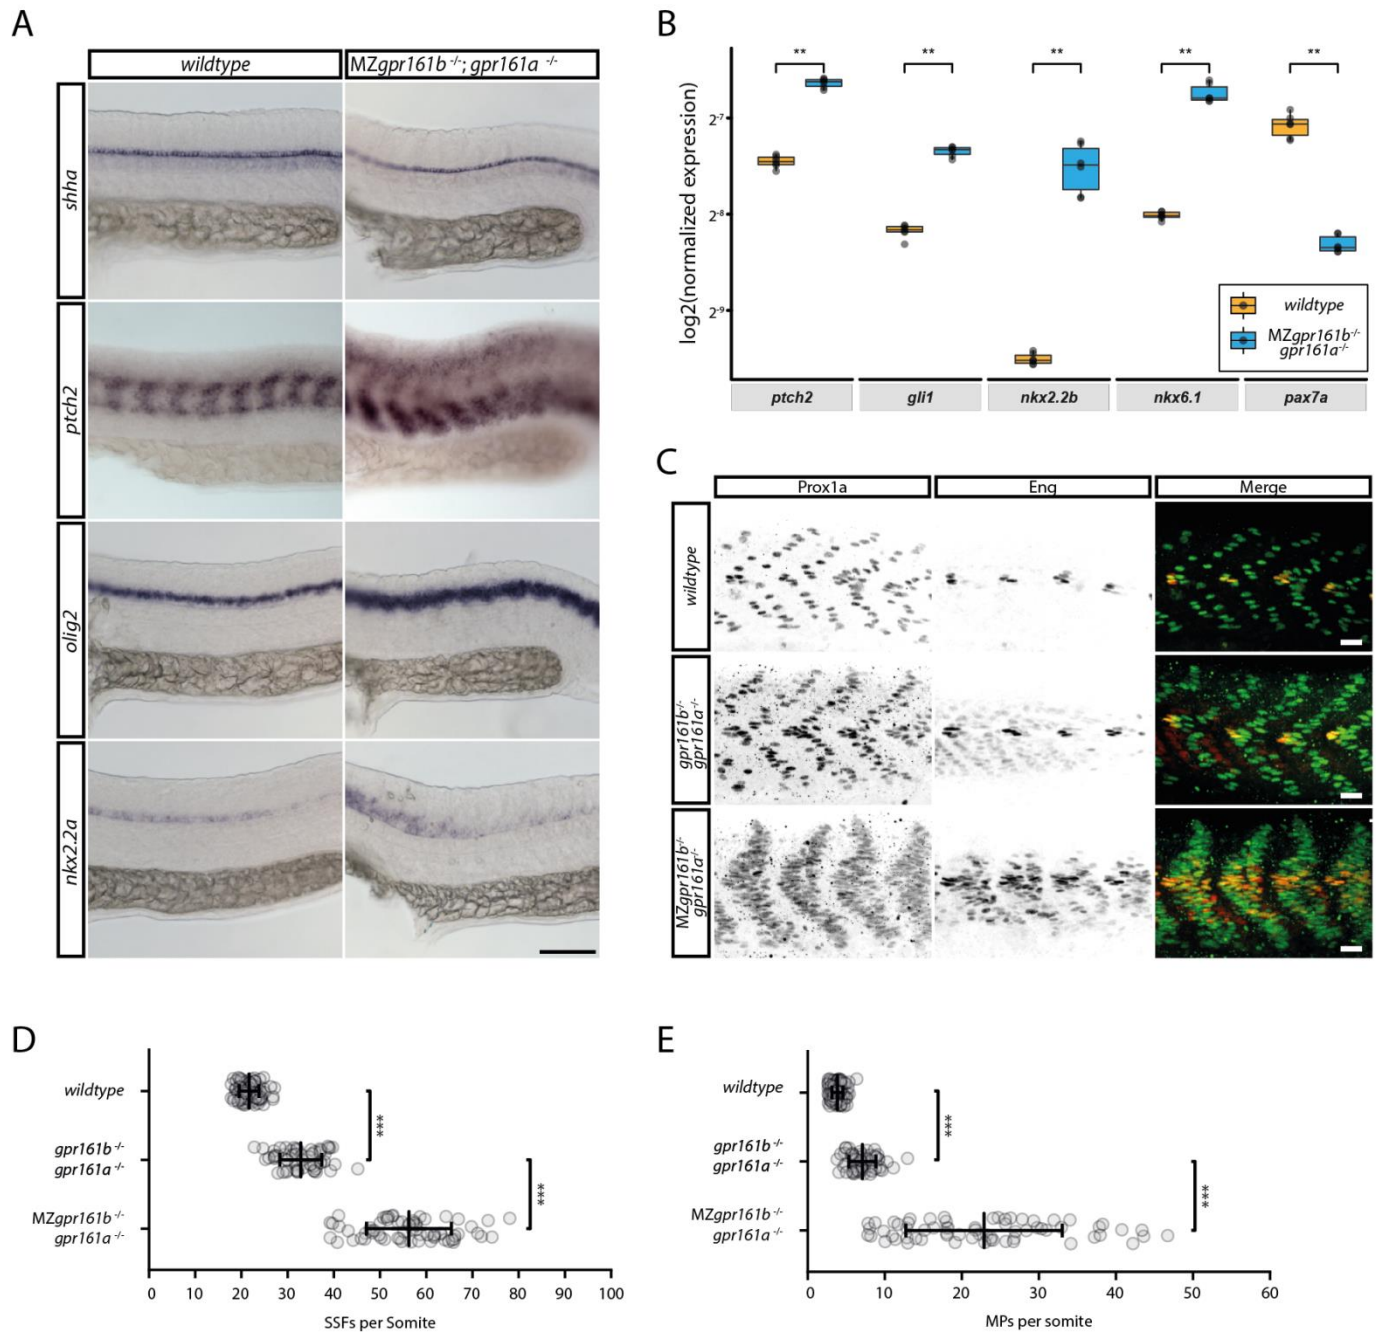

569

570 **Figure 3. Hh signalling activity is increased in *gpr161* mutants. (A)** RNA in situ hybridization of *shh*, *ptch2*, *olig2* and *nkx2.2a*  
 571 transcripts in wildtype and MZ*gpr161b*<sup>-/-</sup>; *gpr161a*<sup>-/-</sup> embryos fixed at 24 hpf (lateral view, scale bar: 100µm). (B) Transcript  
 572 levels of *ptch2*, *gli1*, *nkx2.2b*, *nkx6.1* and *pax7a* in wildtype and MZ*gpr161b*<sup>-/-</sup>; *gpr161a*<sup>-/-</sup> embryos at 24hpf determined by  
 573 RT-qPCR (n=3)(C) Immunostaining of Prox1 and Eng proteins in 24 hpf zebrafish embryos reveal the number of MPs  
 574 (Prox1a/Eng double positive) as well as SFFs (Prox1 positive) in wild-type, *gpr161b*<sup>-/-</sup>; *gpr161a*<sup>-/-</sup> and MZ*gpr161b*<sup>-/-</sup>; *gpr161a*<sup>-/-</sup>  
 575 embryos fixed at 24 hpf (scale bar: 20µm). Number of (D) SSFs and (E) MPs per somite in wild-type (n= 93 somites in 22  
 576 embryos), *gpr161b*<sup>-/-</sup>; *gpr161a*<sup>-/-</sup> (n=60 somites in 20 embryos) and MZ*gpr161b*<sup>-/-</sup>; *gpr161a*<sup>-/-</sup> (n= 66 somites in 22 embryos)  
 577 embryos fixed at 24 hpf.

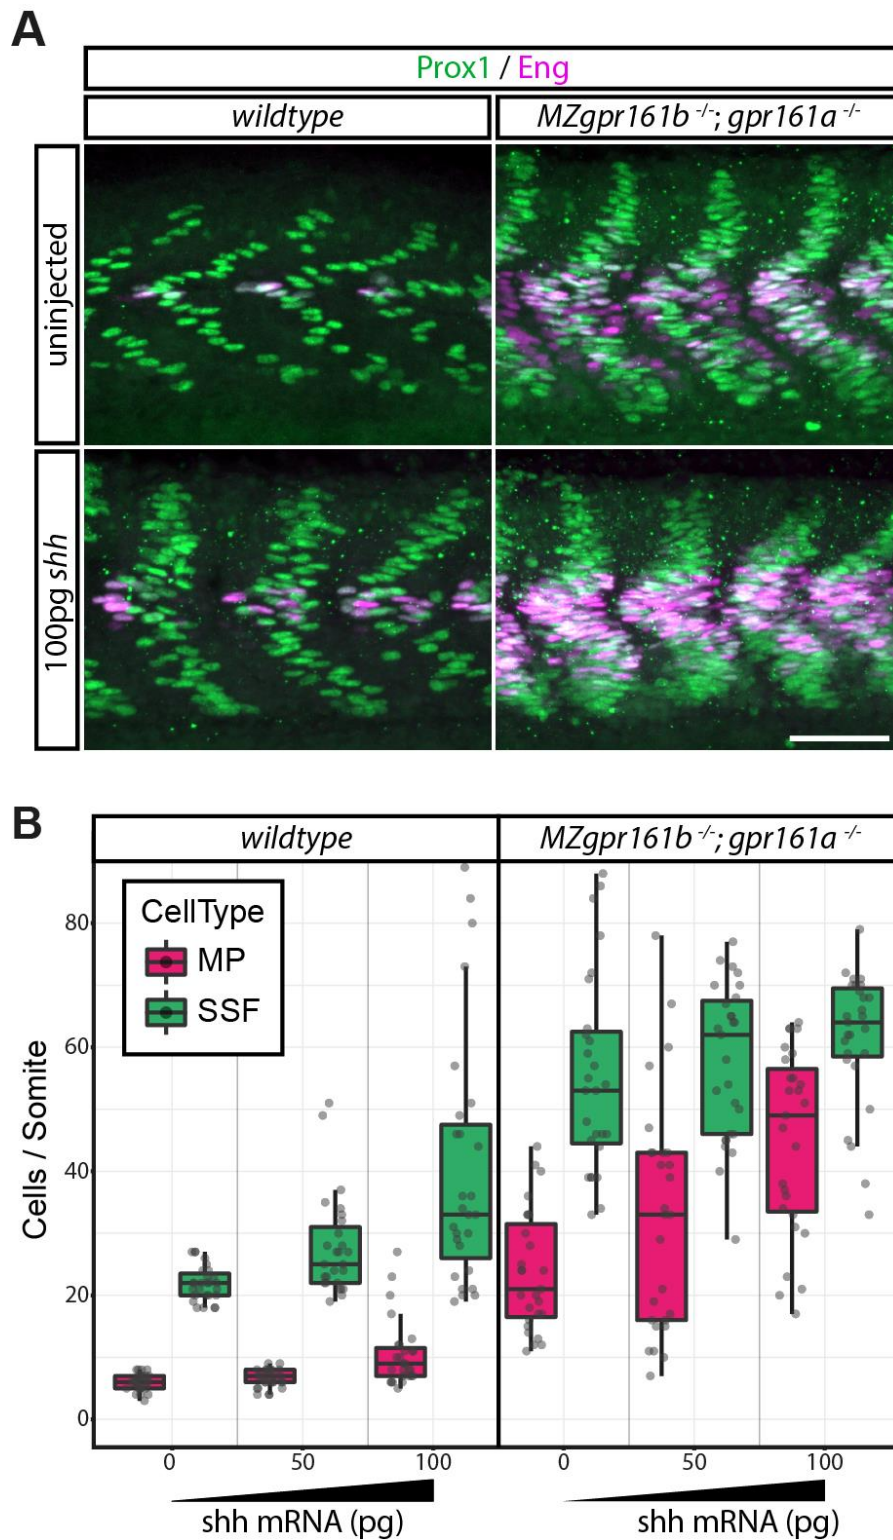

578

579 **Figure 4. Injection of *shh* mRNA can elevate hh signalling outcomes in *gpr161* mutants. (A)** Prox1 (green)/ Eng (purple)  
580 immunostainings of wild-type and *MZgpr161b<sup>-/-</sup>; gpr161a<sup>-/-</sup>* embryos injected with 100 pg of *shh* mRNA (scale bar: 50µm).

581 **(B)** Quantification of MPs and SSFs in wild-type and *MZgpr161b<sup>-/-</sup>; gpr161a<sup>-/-</sup>* embryos injected with increasing amounts of  
582 *shh* mRNA (for all experiments: n=27 somites in 9 embryos).

583



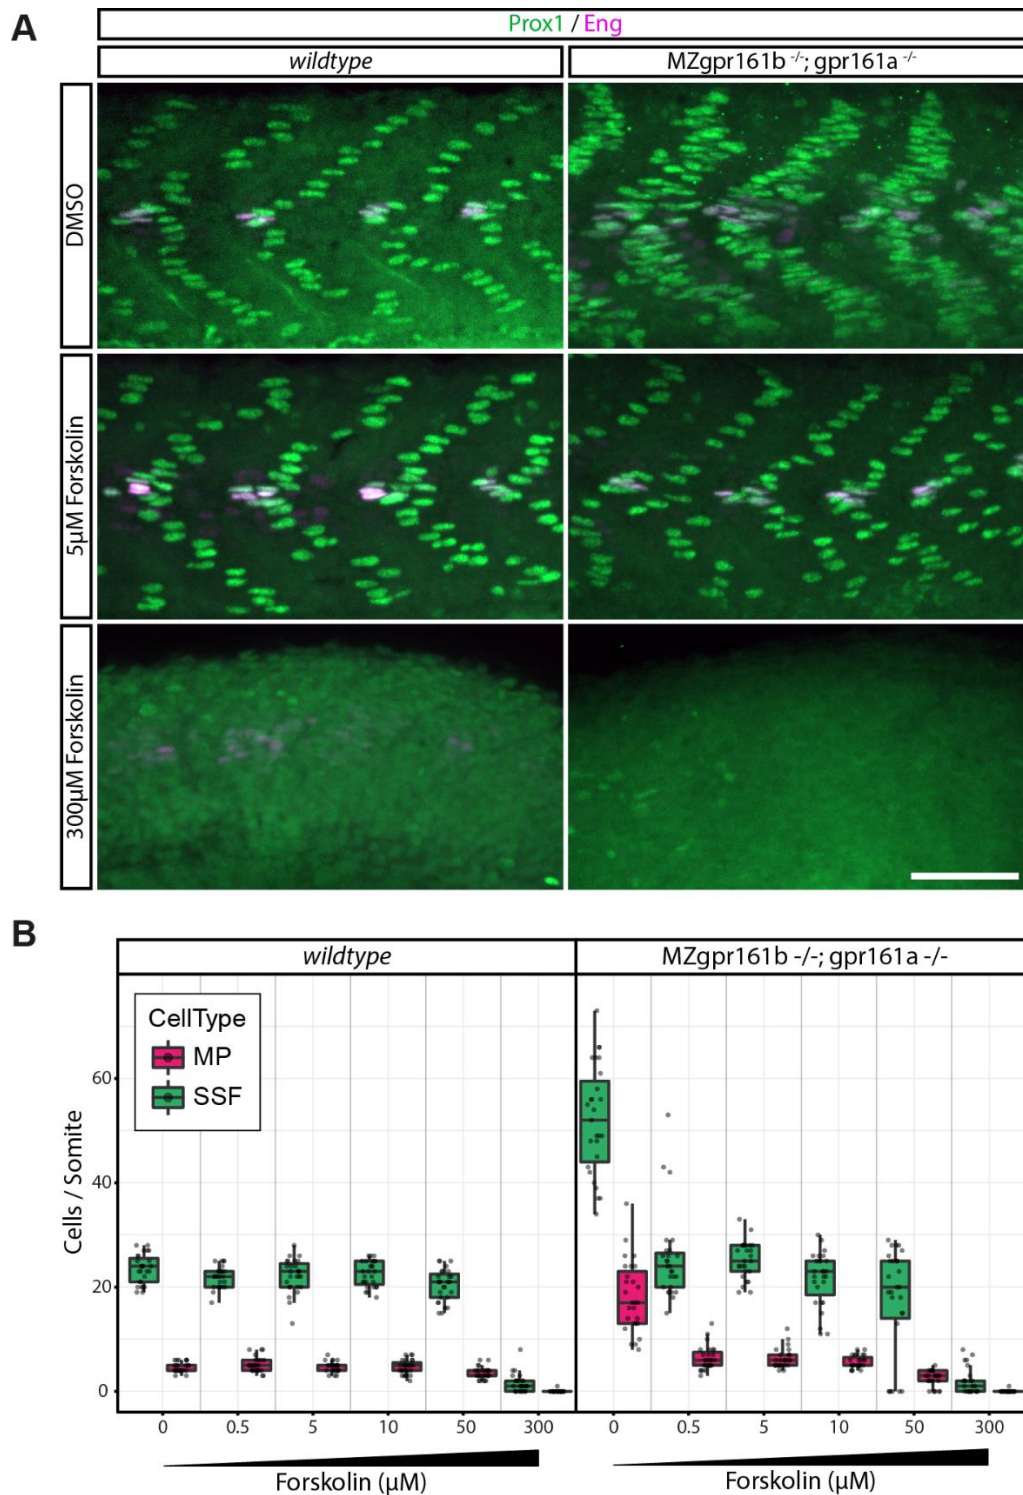

584

585 **Figure 5. Forskolin treatments can rescue the gpr161 phenotype.** (A) Prox1 (green)/ Eng (purple) immunostainings of wild-  
586 type and MZgpr161b<sup>-/-</sup>; gpr161a<sup>-/-</sup> embryos treated with increasing concentrations of forskolin (scale bar: 50µm). (B)

587 Quantification of MPs and SSFs in wild-type and MZgpr161b<sup>-/-</sup>; gpr161a<sup>-/-</sup> embryos treated with increasing concentrations of  
588 forskolin (for each experiment, n=27 somites in 9 embryos).

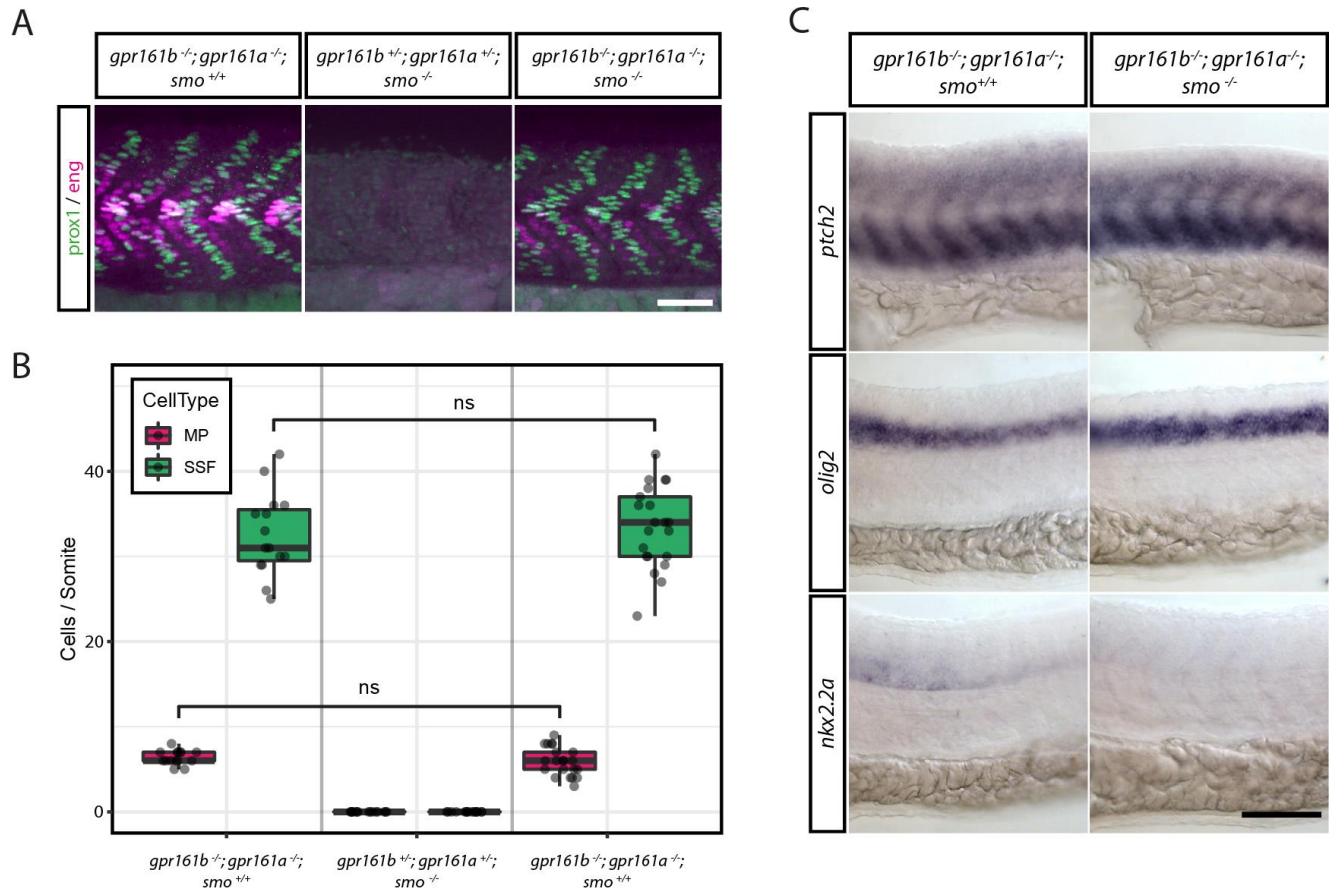

589

590 **Figure 6. The requirement for Smo during high-level Hh signalling in *gpr161* mutants is tissue-specific.** (A) Prox1 (green)/  
 591 Eng (purple) immunostainings of wildtype and MZ*gpr161b<sup>-/-</sup>; gpr161a<sup>-/-</sup>* embryos at 24 hpf after DMSO or 200µM  
 592 Cyclopamine treatment (scale bar: 50µm). (B) Quantification of MPs and SSFs from experiment presented in A (*gpr161b<sup>-/-</sup>;*  
 593 *gpr161a<sup>-/-</sup>; smo<sup>+/+</sup>* and *gpr161b<sup>+/+</sup>; gpr161a<sup>+/+</sup>; smo<sup>-/-</sup>*: n=15 somites in 5 embryos; *gpr161b<sup>-/-</sup>; gpr161a<sup>-/-</sup>; smo<sup>-/-</sup>*: n=21 somites  
 594 in 7 embryos; all others: n=27 somites in 9 embryos). (C) RNA in situ hybridization of *ptch2*, *olig2* and *nkx2.2a* transcripts in  
 595 *gpr161b<sup>-/-</sup>; gpr161a<sup>-/-</sup>; smo<sup>+/+</sup>* and *gpr161b<sup>-/-</sup>; gpr161a<sup>-/-</sup>; smo<sup>-/-</sup>* embryos fixed at 24 hpf (lateral view, scale bar: 100µm).

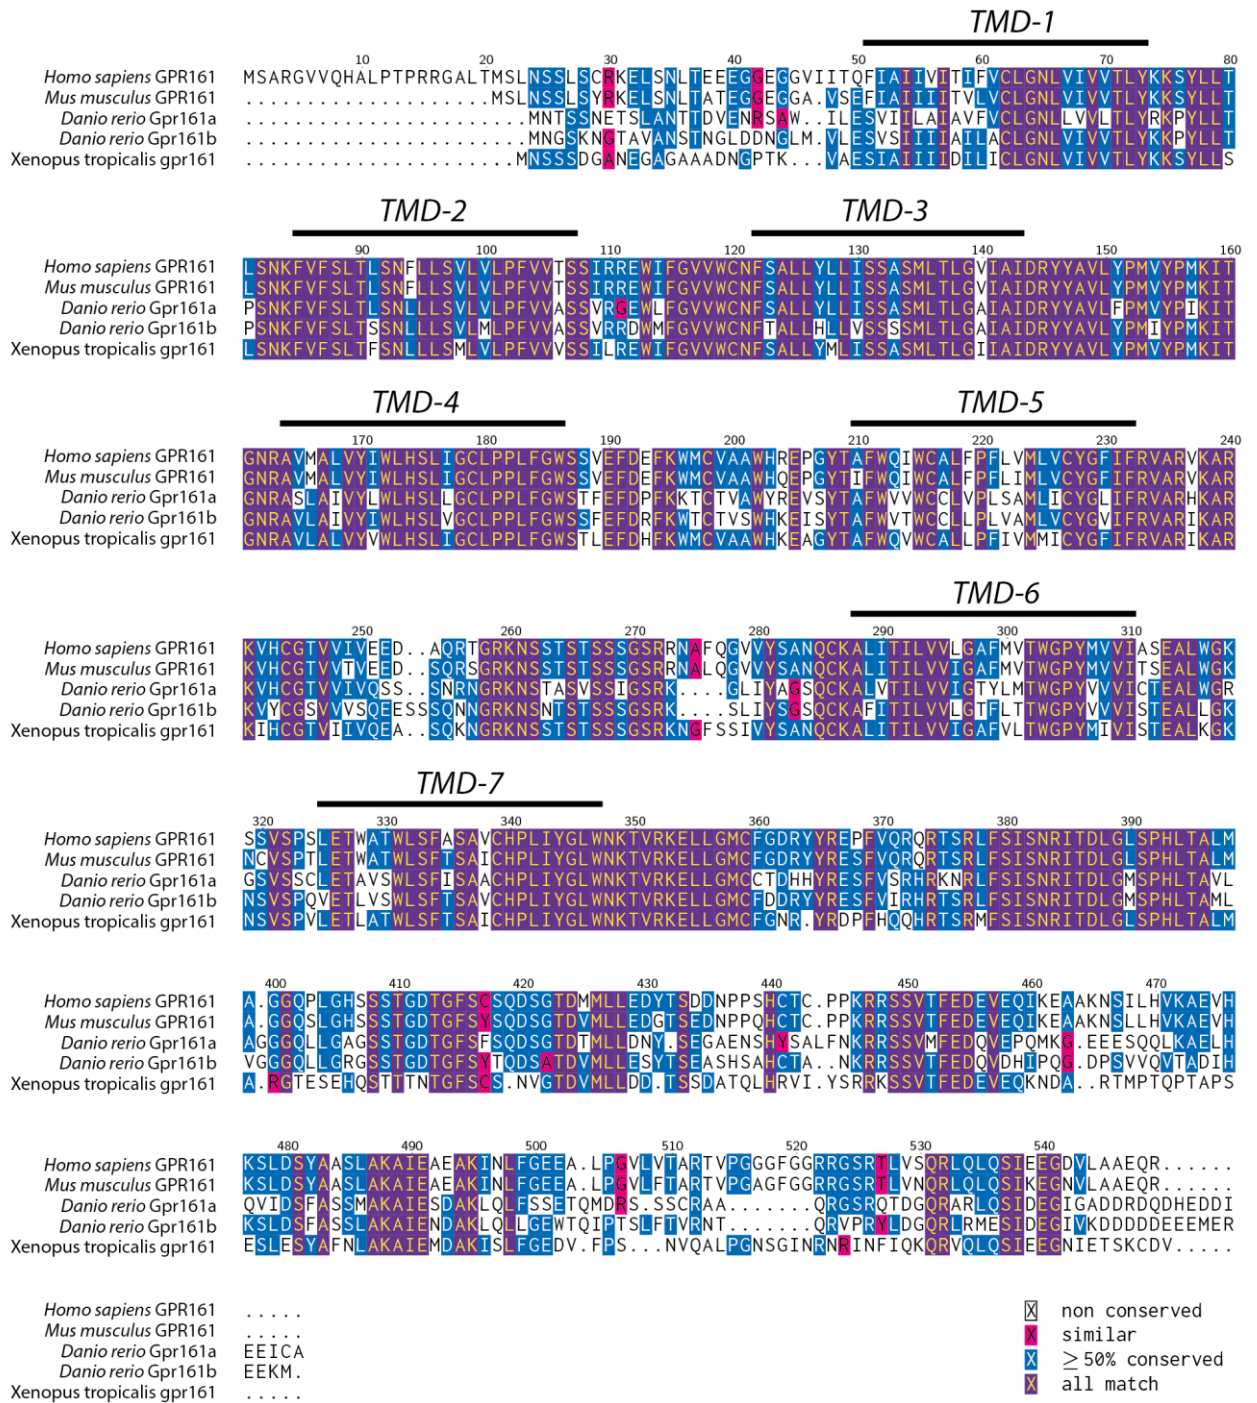

596

597 **Figure 1-Supplement 1. Multiple Sequence Alignment.** The sequences of the *Homo sapiens*, *Mus musculus*, *Danio rerio* and  
 598 *Xenopus tropicalis* Gpr161 proteins were aligned using MUSCLE (Edgar, 2004). Transmembrane domains (TMDs) and  
 599 conserved residues are indicated.

A

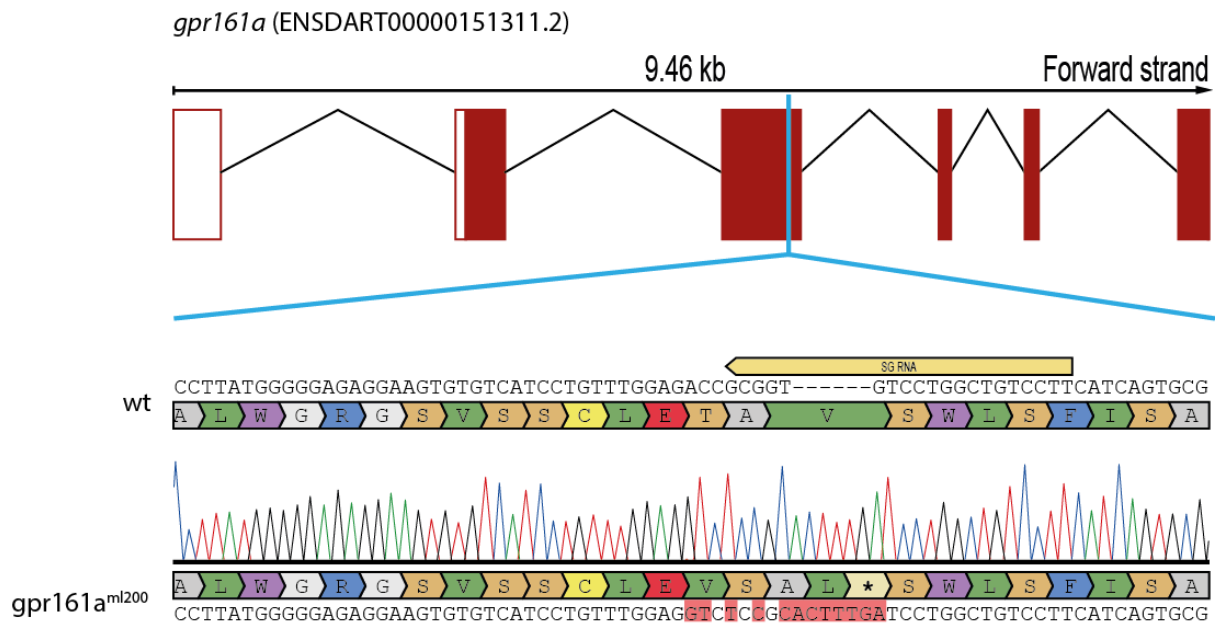

B

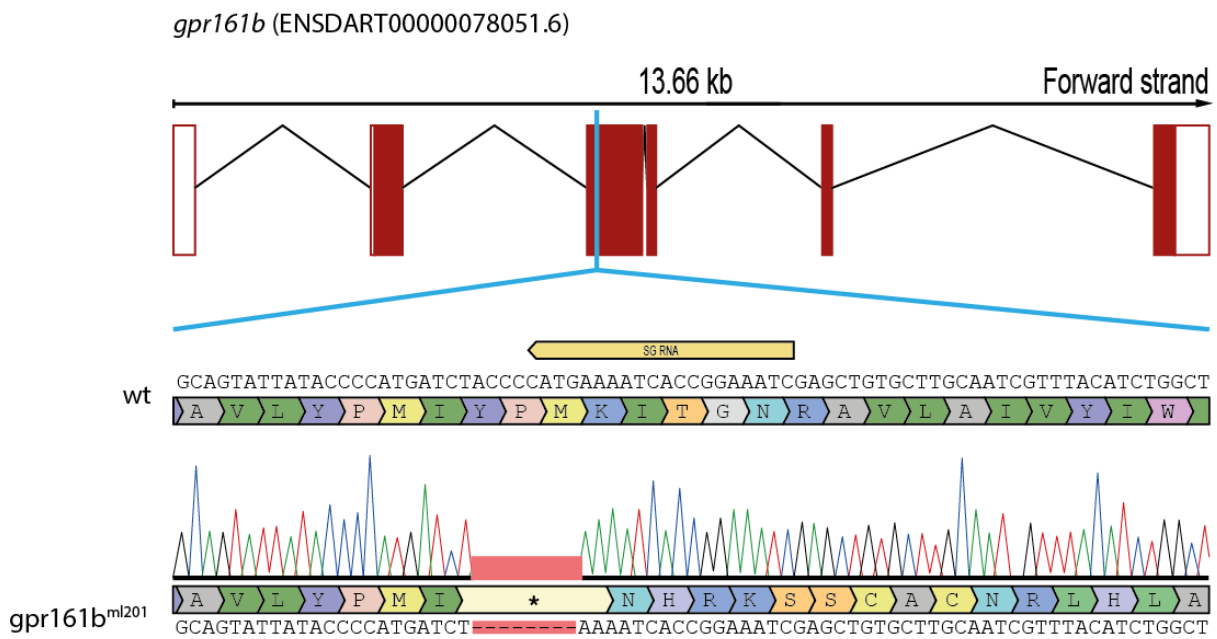

600

601 **Figure 1-Supplement 2. CRISPR knock out strategy.** Schematic representation of the gene structure of *gpr161a* (A) and

602 *gpr161b* (B) indicating the position of CRISPR sgRNA recognition site and a sequence alignment of the obtained mutant

603 alleles.

604

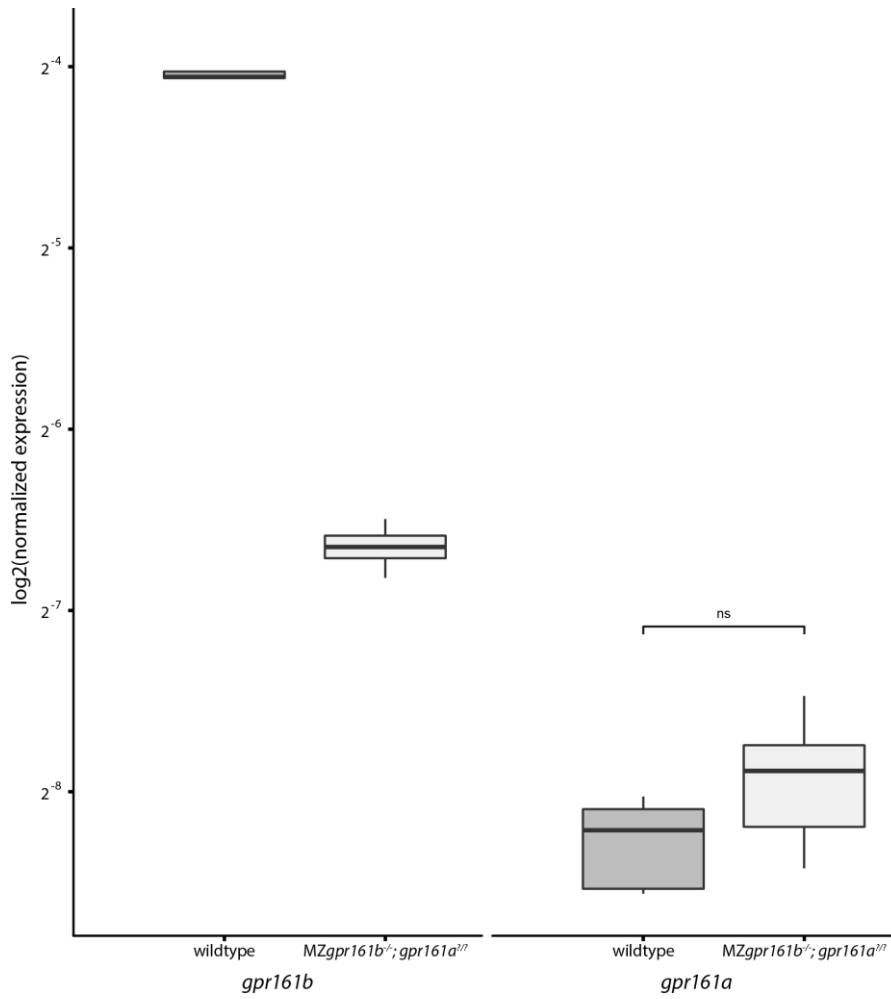

605

606

607

**Figure 2-Supplement 1. Maternal loss of *gpr161b* does not lead to genetic compensation by *gpr161a*.** Transcript levels of *gpr161a* and *gpr161b* in single embryos at 2-cell stage as determined by qPCR (n=6)



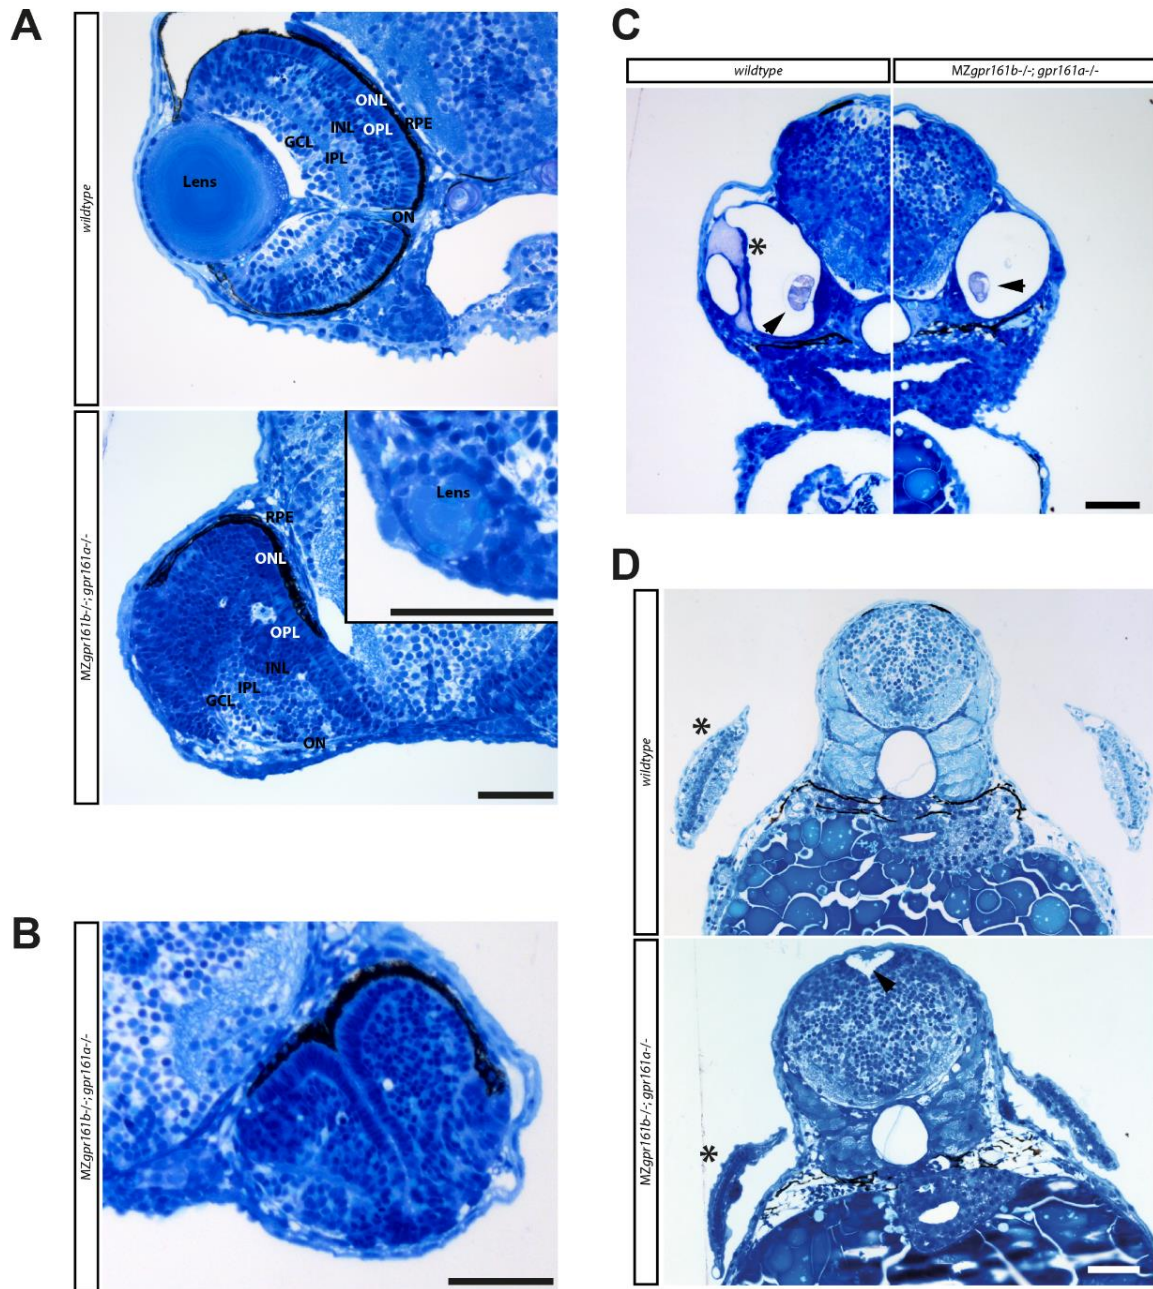

608

609 **Figure 2-Supplement 2. Severe morphological defects in *gpr161* mutant embryos at 72 hpf.** (A) Transverse section through  
610 the embryonic eye at 72 hpf, Retinal layers are indicated as follows: RPE – retinal pigment epithelium, ONL – outer nuclear  
611 layer, OPL - outer plexiform layer, INL – inner nuclear layer, IPL inner plexiform layer, GCL ganglion cell layer. Inset shows  
612 remnant of a forming lens from a different section of the same *gpr161* mutant embryo. (B) Transverse section through the  
613 embryonic eye of a 72 hpf *gpr161* mutant embryo shows a conspicuous invagination of the outer retinal layers. (C)  
614 Transverse section through the otic capsule of wildtype and *gpr161* mutant embryos at 72 hpf. Asterisk highlights central  
615 canal and dorsolateral septum which are missing in *gpr161* mutant embryos. Arrowhead shows otholites. (D) Transverse  
616 section through the hindbrain region of wildtype and *gpr161* mutant embryos at 72 hpf. Asterisks highlight presence of  
617 pectoral fins. Arrowhead shows enlarged brain ventricle. An increase in hindbrain diameter can be noted. (all scale bars:  
618 50µm)

619

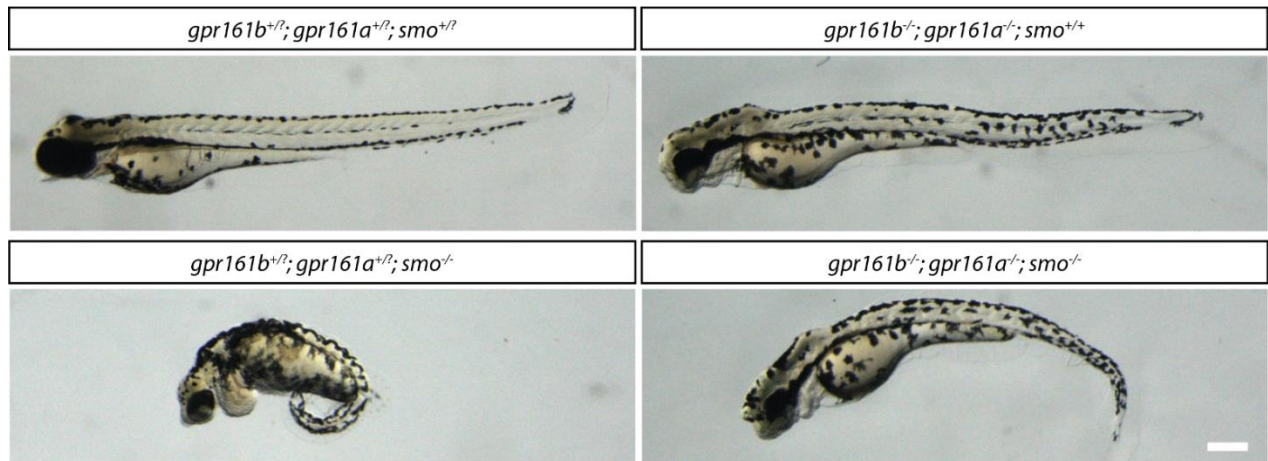

620

621 **Figure 6-Supplement 1. Morphological phenotypes of *gpr161b*<sup>-/-</sup>; *gpr161a*<sup>-/-</sup> mutants are independent of Smo.** Lateral

622 view of embryos from a *gpr161b*<sup>+/-</sup>; *gpr161a*<sup>+/-</sup>; *smo*<sup>+/-</sup> incross at 72hpf (scale bar: 100μm).



623 **Tables**

624

625 **Table 1. List of Antibodies**

| <i>Antibody</i>             | <i>Source</i> | <i>Dilution</i> | <i>Identifier</i> |
|-----------------------------|---------------|-----------------|-------------------|
| Prox1                       | abcam         | 1:500           | ab209849          |
| Engr                        | DSHB          | 1:20            | 4D9               |
| Myc                         | abcam         | 1:500           | ab9106            |
| acTub                       | Sigma         | 1:500           | T7451             |
| Alexa Fluor 647 anti mouse  | ThermoFisher  | 1:500           | A-21235           |
| Alexa Fluor 488 anti rabbit | ThermoFisher  | 1:500           | A-11008           |

626

627 **Table 2. List of Primers**

| <i>Name</i>     | <i>Used for</i> | <i>Sequence</i>                      |
|-----------------|-----------------|--------------------------------------|
| Gpr161a_SSLP_F  | Genotyping      | TGATCTGCACTGAGGCCTTATGGG             |
| Gpr161a_SSLP_R  | Genotyping      | AAGAGGATGACAAGCCGCACTG               |
| gpr161b_SSLP_F  | Genotyping      | CACAAGGGATTGATTGAAATG                |
| gpr161b_SSLP_R  | Genotyping      | ATTGCAAGCACAGCTCGATT                 |
| gpr161a-IVA-F   | Cloning         | AATTC AAGGGCAAACATGAACACCAGCAGCAATGA |
| gpr161a-IVA-R   | Cloning         | CACGAGCCACCTCCTGCGCATATTTCTCGATAT    |
| gpr161b-IVA-F   | Cloning         | AATTC AAGGGCAAACATGAACGGCTCTAAGAATGG |
| gpr161b-IVA-R   | Cloning         | CACGAGCCACCTCCCATTTTTCTCGCGCTCCA     |
| gli1_qpcr_f     | qPCR            | GTAAGGCCACACACACTGATG                |
| gli1_qpcr_r     | qPCR            | GCTACACCCACAGTCCTCTTTG               |
| nkx2.2b_qpcr_f  | qPCR            | GTGCGGACACAAATATCCAGTGC              |
| nkx2.2b_qpcr_r  | qPCR            | ATCCGCGGACAGTTCTGGATTC               |
| nkx6.1_qpcr_f   | qPCR            | GACAGAGAGTCAAGTCAAGGTGTG             |
| nkx6.1_qpcr_r   | qPCR            | TCCTTTCAGCCTCTCGGTTTCTG              |
| olig2_qpcr_f    | qPCR            | TGCACCTGCTACCGGGAATATC               |
| olig2_qpcr_r    | qPCR            | TGTCAGAGTCCATGGCGTTCAG               |
| pax7a_qpcr_f    | qPCR            | ACGGCATTCTGGGAGACAAAGGTC             |
| pax7a_qpcr_r    | qPCR            | TGCGTCTCTGCTTTCTTTGAGC               |
| eef1a1l1_qpcr_f | qPCR            | TCTCTACCTACCCTCCTCTTGTC              |
| eef1a1l1_qpcr_r | qPCR            | TTGGTCTTGGCAGCCTTCTGTG               |
| rpl13a_qpcr_f   | qPCR            | ACAGGCTGAAGGTGTTTGATGGC              |
| rpl13a_qpcr_r   | qPCR            | GGACAACCATGCGCTTTCTCTTG              |
| gpr161b_qpcr_F  | qPCR            | ATAAGAGGAGGAGCTCGGTCAC               |
| gpr161b_qpcr_R  | qPCR            | TGGACTIONGAAGGGTCACCTTG              |
| gpr161a_qpcr_F  | qPCR            | AGCATCTCCAACCGAATCACAG               |
| gpr161a_qpcr_R  | qPCR            | CAACATGGTGTCTGTCCCTGAG               |

628
